# Supplementary material for: Evaluation of Two Highly-Multiplexed Custom Panels for Massively Parallel Semiconductor Sequencing on Paraffin DNA
Source: PLoS One. 2015 Jun 3;10(6):e0128818. doi: 10.1371/journal.pone.0128818 (PMC4454570; doi:10.1371/journal.pone.0128818)
Supplement: S1 File — Each panel is presented in detail in a separate xls sheet (Tables A and C); for each panel, all amplicon read ratios are shown in separate sheets (Tables B and D). (XLS) [file pone.0128818.s001.xls]

## Sheet: Table A_ B Panel
B PANEL; IAD47063_31	Ion_AmpliSeq_Fwd_Primer	Ion_AmpliSeq_Rev_Primer	Gene_Symbol	Chr	Chr__band	Amplicon_Start	Insert_Start	Insert_Stop	Amplicon_Stop	Location__intron_exon	amplicon_GC	ampEVAL_cat10%_TUMOR	common_amplicons_with_T_panel	common_targets_with_T_panel (shifted amplicons)	common_targets_AMP_ID_T_panel	corresponding T panel AMP evaluation_TUMOR
AMPL1039009293	GCCCACCCTGTCCTATCCTT	CATACCGGGACAGGTCAACAG	ERBB2	chr17	17q12	37868366	37868386	37868510	37868531	in8	61.3	2	0	0
AMPL1073217766	AGTTTAAGATGAGTCATATTTGTGGGTT	CTGGTGTTACAGAAGTTGAACTGCTA	PTEN	chr10	10q23.3	89724991	89725019	89725093	89725119	in8-ex9	38.7	3	1	1	AMPL1073217766	3
AMPL1074892261	CTGTCCAATTTCCTAATCTCTGTGATT	ACCAAGAAATGGATCTGTGGGTTATG	CDH1	chr16	16q22.1	68835534	68835561	68835682	68835708	in2-ex3	48.4	1	1	1	AMPL1074892261	2
AMPL1076947608	TTTTGTTTTTAACTTCATTGTTTCTGCTCT	TTCATTCACATCCAGCACATCCA	CDH1	chr16	16q22.1	68849384	68849414	68849520	68849543	in9-ex10	53.3	1	1	1	AMPL1076947608	2
AMPL1105103667	GGCCGTGAGTCTGTTCCAA	GGGAGGTGAGTTCCCAGAGAA	RPPH1	chr14	14q11.2	20811312	20811331	20811420	20811441	ex1	75.3	1	0	0
AMPL1105107322	CATCTCCTGCCCAGTCTGA	TCCTGTCACTCCACTCCCAT	RPPH1	chr14	14q11.2	20811385	20811404	20811505	20811525	ex1	66.3	2	0	0
AMPL1113813538	ATCAAACTACTCACCGCTGAAATCT	TGCCAGCGTTATGATCAGCTC	NCOR1	chr17	17p11.2	16049676	16049701	16049829	16049850	ex10-in10	37.2	3	1	1	AMPL1113806468	1
AMPL1113909491	TGACTACTGCTGTGCCAATTTTGTAT	TCACATCTTAATTAACTTGAATGTTTGCTTAAA	NCOR1	chr17	17p11.2	15943702	15943728	15943813	15943846	in43-ex43-in42	40.7	1	1	1	AMPL1113909491	2
AMPL1114144167	ACAAAAGTTTAACATTTCTGCCAACCA	TGGATTGTTTCATGTTTCTCTGCCT	NCOR1	chr17	17p11.2	15983684	15983711	15983831	15983856	in25-ex25-in24	47.9	3	1	1	AMPL1114144167	2
AMPL1185453124	AGACTCCAGCGCCTTCTCT	AGGTATCCAGCCGCCCA	MYC	chr8	8q24.21	128751141	128751160	128751296	128751313	ex2-in2	66.9	1	0	1	AMPL462566756	2
AMPL1205191981	CCCAGTGGTATGTGGGAGTTT	ACGTTTACTGAATTGCCTGTATGAGG	BRCA2	chr13	13q12.3	32900374	32900395	32900522	32900548	ex6-in6	32.3	2	0	1	AMPL388230636	1
AMPL1224430587	CATATTTAGGCCAGTTCCAGTGACA	GACACCTACATTGGTTCTGTGGAAT	TOP2A	chr17	17q21-q22	38572857	38572882	38573002	38573027	in2-ex2	39.7	3	1	1	AMPL1224430587	2
AMPL1234995130	GATCGAAGATTGTTTATGCATCATGTTTCT	GGGAAGTGTTAACTTCTTAACGTTAGTG	BRCA2	chr13	13q12.3	32920975	32921005	32921118	32921146	ex13-in13	28.1	1	1	1	AMPL1234995130	0
AMPL1250893558	GCCTTTCTCTTCTTCCTTGACTTTAGA	GGCAGACATGTTGATTATGTAGCTGA	TOP2A	chr17	17q21-q22	38567553	38567580	38567678	38567704	in9-ex9	38.4	2	1	1	AMPL1250893558	3
AMPL1481297863	ACTTTGTGGAGACAGGTTCCTTG	ACTCAGTCATAACAGCTCAAAGTTGAA	BRCA1	chr17	17q21	41267762	41267785	41267878	41267905	ex3-in2	33	2	1	1	AMPL1481297863	2
AMPL1481474315	AAACACGCACCTCAAAGCTG	CTACCTGGAGCTGGAGCTTAG	TP53	chr17	17p13.1	7577115	7577135	7577268	7577289	in7-ex8	48.1	2	0	1	AMPL388035064	2
AMPL1481481122	TCAGCTGCCTTTGACCATGA	CTGAATGAGGCCTTGGAACTCAA	TP53	chr17	17p13.1	7573824	7573844	7573974	7573997	ex10-in10	62.3	1	0	1	AMPL387884468	1
AMPL1481595514	GTACTCATGAAAATGGTCAGAGAAACCT	GGTGGCGTAGGCAAGAGTG	KRAS	chr12	12p12.1	25398122	25398150	25398266	25398285	in2-ex2	34.5	3	0	0
AMPL1481773781	GGGATACGGCCAGGCATT	CCTGTCATCTTCTGTCCCTTCC	TP53	chr17	17p13.1	7579257	7579275	7579389	7579411	ex4-in4	56.1	2	0	1	AMPL705681709	3
AMPL1482263087	CAGGCCTCCGTGCCATT	CCTTCGGTGGTGGTGGTG	NOTCH1	chr9	9q34.3	139438479	139438496	139438592	139438610	ex2-in1	67	1	1	1	AMPL1482263087	2
AMPL1483280789	GAGCCATTTCCATCCTGCAGA	TGGATACAGGTCAAGTCTAAGTCGAAT	PTEN	chr10	10q23.3	89624138	89624159	89624285	89624312	5'UTR-ex1	58	1	0	1	AMPL393467543	3
AMPL1492638100	GGCCTGGTGGGCAAAGAG	ACGCTACTTCCTCCTCAAGAATGA	AKT1	chr14	14q32.32	105246354	105246372	105246504	105246528	in3-ex3	59.1	1	0	1	AMPL3715168525	3
AMPL1496009646	GCCATTTGTTTTGACACAGGATTTCTTA	AAATATTGATTGTTTCTAATAGAGCAGCCA	PIK3CA	chr3	3q26.3	178948084	178948112	178948202	178948232	ex20-in20	36.3	3	1	1	AMPL1496009646	3
AMPL1497305257	TCGACAGCATGCCAATCTCTT	ACCATGATGTGCATCATTCATTTGTTT	PIK3CA	chr3	3q26.3	178951918	178951939	178952065	178952092	ex21	38.1	3	0	1	AMPL392174806	2
AMPL1501683308	GTTGATTGTCTTTAGAGAGAGGAGTGG	TGTAGGACTGAAACATGAAAATGCCTAT	MDM2	chr12	12q14.3-q15	69239314	69239341	69239410	69239438	(3'UTR)	29	1	0	0
AMPL1516620128	TGGAAACTTTCCACTTGATAAGAGG	TGCAGTTATGCCTCAGATTCACTTTTAT	TP53	chr17	17p13.1	7576812	7576837	7576950	7576978	in8-ex9-in9	50	1	1	1	AMPL1516620128	1
AMPL1522554799	CCACACTGAAAGTGACTGATGCT	GCCAGTTTCTGCATCTTGCC	CDH1	chr16	16q22.1	68847259	68847282	68847413	68847433	ex9-in9	45	1	0	1	AMPL408614224	3
AMPL1522605007	CGTGTCAGGAGGCGTGT	TCGGAGCCGCCATTGTT	MAP2K4	chr17	17p12	11924069	11924086	11924199	11924216	5'UTR	76.1	0	0	0
AMPL1530794058	GTGTTCAAACCACGGAGTTCAC	TCTCCATTTTCCTTTATTTTCAGCCTTCT	CHEK2	chr22	22q12.1	29083867	29083889	29083968	29083997	ex16 (3'UTR)	63.3	2	0	0
AMPL1531740927	AATAACATGCCAAGCAGAATGTATAAAAAT	GCACCACTGATCTTGGATGTACATTTA	PALB2	chr16	16p12.2	23614467	23614497	23614601	23614628	3'UTR	26.9	1	0	0
AMPL1566372753	ACAACCATACATCTAATTCCTTAAAGTAGTTT	CGGAGGCATTCTAAAGTCACTATCATTC	PIK3CA	chr3	3q26.3	178916552	178916584	178916698	178916726	ex2	43	2	0	0
AMPL1622335342	TCAAATCTCTGCGAACGATTGTGAT	GTGAAAAGGACCAGGTGACCA	PTEN	chr10	10q23.3	89622689	89622714	89622839	89622860	near gene 5'	60	2	0	0
AMPL1722231417	TCCGAGGAAAATTGAGGACAATAATTCA	ACAGAAGCCTAACGTTTCCACAT	PTEN	chr10	10q23.3	89626920	89626948	89627071	89627094	in1	22	0	0	0
AMPL1779912411	CCCGGACCCCTCAGGTA	GCAGCTCCCCAGCAGTG	ARID1A	chr1	1p35.3	27024018	27024035	27024137	27024154	in1	76.5	0	0	0
AMPL1786991673	CATTTTAGCAGTGTTATAAATGTATTCTTCTGT	GCATTGTTCTGATTCTTTGCAAGTTTT	PIK3CA	chr3	3q26.3	178916463	178916496	178916590	178916617	in1-ex2	30.9	1	0	0
AMPL1790516679	GGGTTATATATTCAGTGGCCAGAGG	ATGGGTTAGTCCCGCCATA	ARID1A	chr1	1p35.3	27056076	27056101	27056186	27056205	in1-ex2	43.5	1	0	0
AMPL1890435868	TGTCTTAGATTGGTTCTTTCCTGTCT	TTTGTCATATTTTTCCCCTCTGGATTCA	PIK3CA	chr3	3q26.3	178935810	178935836	178935936	178935964	in9	21	0	0	0
AMPL1984952722	GATGTGAATGAAGCCCCCATCT	AATAACCAGTTGCTGCAAGTCA	CDH1	chr16	16q22.1	68849532	68849554	68849684	68849706	ex10-in10	47.7	2	0	1	AMPL409211834	3
AMPL1992796664	CCAGACCTAAGAGCAATCAGTG	CGCGCCATGGCCATCTA	TP53	chr17	17p13.1	7578284	7578306	7578441	7578458	ex5-in5	63.7	1	0	1	AMPL1206820909	2
AMPL2020425967	GTCAGCCGAAGGCTCCAT	GGCTCTTCCGCCAGCAC	CDKN2A	chr9	9p21	21974785	21974803	21974935	21974952	ex1-5'UTR	61.5	0	0	0
AMPL2079868394	TGTTATTTTATAGGGTGACTGTTGGATCTG	AGACCAGGTACTTACTGCTAAAGTGATT	MAP2K4	chr17	17p12	12011094	12011124	12011213	12011241	in4-ex5-in5	28.9	1	1	1	AMPL2079868394	0
AMPL2426801435	CACACTTTGTCTTTGACTTCTTTTTCTTCT	TGTACACATGAAGCCATCGTATATATTC	KRAS	chr12	12p12.1	25362740	25362770	25362873	25362901	(3'UTR) ex6-in5	29.1	1	0	0
AMPL2646901541	CAGACTGTACTTACTGCAGCAGATA	CTACTAATAAAGTATAAAATGGTGACGAATCCT	MAP3K1	chr5	5q11.2	56160668	56160693	56160763	56160796	ex4-in4	50.7	3	1	1	AMPL2646901541	3
AMPL2685800356	AGGAATGCCTTCAAAAAGTTGGGA	CTCCAGTGCATCCATGAACTCT	FGFR1	chr8	8p11.23-p11.22	38275706	38275730	38275858	38275880	in10-ex10	58.1	2	1	1	AMPL2685800356	2
AMPL2687294785	CCCCTGACTCCGTCCAGTATT	CGAGACACGCCCTTACCTT	EGFR	chr7	7p12	55086912	55086933	55087055	55087074	ex1	72.1	0	0	1	AMPL3659127744	1
AMPL2705185935	TGCAGTCTTCTACCTGTGTCTATATCTT	CAGTATCATATTCACACAAAAATTCAACCA	PIK3CA	chr3	3q26.3	178917726	178917754	178917870	178917900	in3	29.9	2	1	1	AMPL2705185935	1
AMPL2841717195	CGCCTCCTCGGAGTCCTT	GGCGTCACTCACACCCG	FGFR3	chr4	4p16.3	1795718	1795736	1795860	1795877	ex2-in2	76.8	0	1	1	AMPL2841717195	1
AMPL3015471280	GAAAGCAGCGTGTCGATTTGT	ACTGAGGTGGCATCTGTCAAAAA	ARID1B	chr6	6q25.1	157222349	157222370	157222499	157222522	in2	33.8	3	1	1	AMPL3015471280	1
AMPL3147638143	CGTGCGCTGTGCAAATGAG	CAGTGTGGCATGGTGGAAAAG	MKS1	chr17	17q22	56296837	56296856	56296946	56296967	5' UTR-ex1	52.2	3	0	0
AMPL3333251692	ATCTGCATCATAAAGTCGTCTCATTGT	CAATCGCTATGTCCTGAGTTGGT	E2F3	chr6	6p22	20490258	20490285	20490409	20490432	in6-ex7	29.6	3	1	1	AMPL3333251692	1
AMPL3426752792	GGGATGTGATGAGAGGTGGA	CCATCCTCACCATCATCACACT	TP53	chr17	17p13.1	7577372	7577392	7577510	7577532	ex7-in7	61	2	0	1	AMPL388739660	2
AMPL3430096723	GTGTGATTACAGTCAAAAGGCCTCTA	GCGAACTTCTCAGAAAAATGCCA	CDH1	chr16	16q22.1	68835651	68835677	68835802	68835825	ex3-in3	54.4	1	0	1	AMPL2597623118	2
AMPL3430169584	GCCTCACGTTGGTCCACATC	GCGAGGGTCTGACGGGTA	AKT1	chr14	14q32.32	105246451	105246471	105246589	105246607	ex3-in2	59.3	2	0	1	AMPL3715171956	3
AMPL3450176918	ACAGGCCGATTTCCTTATCCAAAG	CCATGCGTGTTCGACCATT	MAP2K4	chr17	17p12	12032468	12032492	12032622	12032641	ex9-in9	42.3	2	0	1	AMPL737613565	3
AMPL3492596718	CCAGTGTGATCTCTGAAATTAAATTACTTCA	GAATCAGTGCCAATTTGAAAGCAAGATA	BRCA2	chr13	13q12.3	32973659	32973690	32973782	32973810	ex27 (3'UTR)	21.5	0	1	1	AMPL3492596718	0
AMPL3501685042	CCTAGAACCCCTCCCAGCTT	TGACCCCGTCATCTGAGGAG	TERT	chr5	5p15.33	1279706	1279726	1279815	1279835	in4	58.9	3	1	1	AMPL3501685042	2
AMPL3503453465	TGTCCACCTCACCCCACA	CGTGCGCTTCCGCTTAC	TERT	chr5	5p15.33	1279796	1279814	1279943	1279960	in4	72.3	0	1	1	AMPL3503453465	0
AMPL3503455543	GACACGGATCCAGGACCTC	GCCGGTGCCTCCAGAAAA	TERT	chr5	5p15.33	1279981	1280000	1280093	1280111	in4	71.3	3	1	1	AMPL3503455543	2
AMPL3503464798	CAGGAGCTCCCCCTACAC	TGCGTTTGAGCCCCACATT	TERT	chr5	5p15.33	1280065	1280083	1280214	1280233	in4	65.9	1	1	1	AMPL3503464798	1
AMPL3659666477	CAGTATAGAGCGTGCAGATAATGACA	AAACACACATCACATACATACAAGTCA	PTEN	chr10	10q23.3	89720761	89720787	89720907	89720934	ex8-in8	30.8	2	0	0
AMPL3660830892	ACTGTTTCAGGAAGGAATGTTCCC	GCTTCATCATACCTTTCACTAAGACAAGA	BRCA2	chr13	13q12.3	32899203	32899227	32899304	32899333	ex4	35.1	3	0	0
AMPL3662030403	CAGATGATGTTTCCTGTCCACTTCTAAA	CAGGCTCTTAGCCAAAATATTAGCATAA	BRCA2	chr13	13q12.3	32899276	32899304	32899402	32899430	ex4-in4	22.4	0	0	0
AMPL3665288693	CCTCCTAAAGAACTGCACAGTGA	CAAGTTACCTGTGATCCAATTTCGAC	RB1	chr13	13q14.2	48951044	48951067	48951152	48951178	ex13	35.3	3	0	1	AMPL3665288574	1
AMPL3669092695	CTCCTCTTGACCTGCTGTGT	TGAAGTAAAAGGTGCACTGTAATAATCCA	KRAS	chr12	12p12.1	25380269	25380289	25380368	25380397	ex3-in2	43	3	0	0
AMPL3669331689	AATGTATTTGCTTTTTCTGTAAATCATCTGT	GAGCTGTTCTTTGTCATTTTCCCTTAAT	PIK3CA	chr3	3q26.3	178935907	178935938	178936023	178936051	in9-ex10	29.4	0	0	1	AMPL1745719238	0
AMPL3669335871	TCGCTCCCAGTCCGAAATG	GCCCCGAACTCATCGGT	KRAS	chr12	12p12.1	25403752	25403771	25403883	25403900	ex1-5'UTR	78.6	0	0	0
AMPL3677987774	TCTAAGATCAGTCTTCAAATGTTCTTAAAGCA	TCAAGGAACCTTCTGTTTGCAATGA	RAD51C	chr17	17q22	56811418	56811450	56811517	56811542	in8-ex9	29.9	0	0	0
AMPL3677988471	CCTCAGGGATTTAGAGATACTGTTGTTAC	AGTCCACTTGTACACATTGATTTCACA	RAD51C	chr17	17q22	56811479	56811508	56811622	56811649	ex9	41.2	2	0	1	AMPL3814205865	2
AMPL3678073022	TCGCACTCAACTTACTTCTTTCTGG	GTCGTCGGAGGAGGACAAG	MLL3	chr7	7q36.1	152132696	152132721	152132850	152132869	ex1	72.9	0	0	0
AMPL3678088234	CACCTTGTTTTCTGAGTTTTTCGCT	AGATTCCCACACATTTCTCTTTGCTT	MLL3	chr7	7q36.1	151847982	151848007	151848097	151848123	ex51-in50	40	2	0	0
AMPL3690591008	CACTCCTGCAAGGCACACT	CACCCAGGGCTTCCATTG	NOTCH4	chr6	6p21.3	32190760	32190779	32190884	32190902	in2ex2-in1	64.2	1	1	1	AMPL3690591008	2
AMPL3695253731	ACCGGAGTAACCTTCCCTCA	CTGTTTCCAGACAAGCCACTCA	EGFR	chr7	7p12	55270177	55270197	55270319	55270341	in26-ex27-in27	57.4	3	0	1	AMPL4295957242	2
AMPL3697208455	GCATGAACCTTATGGGCAGCA	GAGTTTTAGCCTCCAGGACAGAA	ARID1B	chr6	6q25.1	157519945	157519966	157520080	157520103	ex16-in16	67	2	1	1	AMPL3697208455	1
AMPL3706092677	AGACCACTGCTTTTGCAAGGT	AGCTGGAAAAAGGATGAAGAACTGTT	RB1	chr13	13q14.2	49054010	49054031	49054109	49054135	in26	44.9	3	0	0
AMPL3706114419	CTTACCCAGTACCATCAATGCTGTT	GTACACAGTGTCCACCAAGGTC	RB1	chr13	13q14.2	49054085	49054110	49054216	49054238	in26-ex27 (3'UTR)	39.6	3	0	0
AMPL3709541172	GCGCTGCCTCCTCCAAAT	CTGATCGGGAGCCGGTT	ZNF703	chr8	8p11.23	37553482	37553500	37553632	37553649	5'UTR-ex1	74.2	0	0	0
AMPL3717154545	CCTCCCTCCAGGAAGCCTAC	GGGAGCCAATATTGTCTTTGTGTTC	EGFR	chr7	7p12	55248975	55248995	55249111	55249136	ex20	65.5	2	0	0
AMPL3753971960	ACTGAAAATTGTAAAGCCTATAATTGTCTCA	GGTACACAGGTAATCGGCTCTAA	BRCA2	chr13	13q12.3	32920854	32920885	32921004	32921027	in12-ex13	24.2	0	1	1	AMPL3753971960	0
AMPL3770477939	ATTCGGCAGGAAATTAAAAGCATTACC	TCCCTATCCTGGGAACATTAGGTC	MLL3	chr7	7q36.1	151876893	151876920	151877026	151877050	ex37	48.1	2	0	0
AMPL3777636351	TGGTAATATTAATCTTCAACCATTTCTTTCCA	GTGGTCATTGAACCGCTATTGATT	SF3B1	chr2	2q33.1	198267585	198267617	198267729	198267753	in13-ex13	30.4	1	0	0
AMPL3867808362	CCTTCCACTCTAGCATAGTAATCTTCAT	CTTATGTATGTTTAATTCTGTACATGAGCATTT	SF3B1	chr2	2q33.1	198267701	198267729	198267809	198267842	ex13-in12	37.5	3	0	0
AMPL387798235	AATGTCAGCTTATTATATTCAATTTAAACCCAC	GCAATGAGGGACCAGTACATGA	KRAS	chr12	12p12.1	25380135	25380168	25380240	25380262	ex3	33.3	2	0	0
AMPL387798416	GAAAGCCCTCCCCAGTCC	AGGATTCCTACAGGAAGCAAGTAGT	KRAS	chr12	12p12.1	25380223	25380241	25380323	25380348	ex3	46.3	3	0	0
AMPL387899835	CTGGAGTGAGCCCTGCT	TCCCCCTCCTCTGTTGCT	TP53	chr17	17p13.1	7573927	7573944	7574037	7574055	in9-ex10	62.8	1	1	1	AMPL387899835	2
AMPL387987361	TGAGGTGACCCTTGTCTCTGT	CCAGCACTTTGATCTTTTTGAATTCAGT	EGFR	chr7	7p12	55241576	55241597	55241679	55241707	in17-ex18	53.7	3	0	0
AMPL388229887	CTTCTATAAAGTTAGGTGTTTCCTGGGT	ACCCTGCTAGTCTGGAGTTGAT	BRCA1	chr17	17q21	41267659	41267687	41267784	41267806	in3-ex3	36.7	3	1	1	AMPL388229887	2
AMPL388285969	TGGTAACTCAGACTCAGCATCA	TGTGTGAACGGACACTGAAATATTTTCT	BRCA1	chr17	17q21	41215782	41215804	41215928	41215956	in17-ex17	38.4	1	1	1	AMPL388285969	1
AMPL388320072	CACACACACACGCTTTTTACCTG	AGCAAGTTGCAGCGTTTATAGTCT	BRCA1	chr17	17q21	41242941	41242964	41243085	41243109	in10-ex11-in11	43.8	3	0	0
AMPL388340296	CCCAACAAAAGAGACTAGAAGCCTTAT	AATGTTAAATTCAAAGTCTCTAAGACTTTGTTC	BRCA2	chr13	13q12.3	32945175	32945202	32945279	32945312	ex20-in20	28.9	0	0	0
AMPL390607789	CTTGTGGCGCGAGCTTC	GCCGGAGTAAGCTGACAAAAAC	BRCA2	chr13	13q12.3	32889614	32889631	32889755	32889777	ex1	69.4	1	0	0
AMPL391535344	TGGAGAAGTTAGACATGTCAACCTTTTG	ATTTACCTGGGCTACTTCATCTCTAGAA	PIK3CA	chr3	3q26.3	178936910	178936938	178937043	178937071	in 10-ex11	35.8	3	1	1	AMPL391535344	2
AMPL391623459	CACCACCAGCGTGTCCA	CCTGGCTCTGACCATTCTGT	CDKN2A	chr9	9p21	21971070	21971087	21971219	21971239	ex2-in1	71.2	0	0	1	AMPL1487650614	2
AMPL391623903	GAGCCTGCACTCCACAGA	CTGACCACGGCCTGGAC	NF1	chr17	17q11.2	29422203	29422221	29422354	29422371	5'UTR-ex1	76.9	0	1	1	AMPL391623903	1
AMPL391625689	CACAGGCCGGTGGAATG	CTCCTACCTCCCCTCACCTA	NF1	chr17	17q11.2	29422337	29422354	29422441	29422461	ex1-in1	73.9	1	1	1	AMPL391625689	1
AMPL391670001	CCGCTGCAGACCCTCTAC	GGAGCAGCATGGAGCCTT	CDKN2A	chr9	9p21	21974655	21974673	21974792	21974810	in1-ex1	73.9	0	0	0
AMPL392083508	ATTCATTTTGTGTGTATGTGTGTGCT	AGGATCCAGGAGTTTTTGTAGATAGGT	NF1	chr17	17q11.2	29562800	29562826	29562947	29562974	in28-ex29	35.5	2	0	0
AMPL392144125	GTGCATTTCTGTAGGTATATGGTGCT	GCGGTTCTATGTGAAAAGATGACAAAC	NF1	chr17	17q11.2	29562922	29562948	29563039	29563066	in28-ex29-in29	40.7	3	0	0
AMPL392236218	CGGTTGGGATGCCTGACA	GCCTCTGCCGCCTAGTTTC	BRCA2	chr13	13q12.3	32889484	32889502	32889631	32889650	5'UTR-ex1	65.9	0	0	0
AMPL392292511	CCTAGCCTTAGATAAAACTGAGCAAGA	GTGTGGAATCCAGAGTGAGCTTT	PIK3CA	chr3	3q26.3	178952020	178952047	178952171	178952194	ex21	36.3	3	0	1	AMPL766379119	3
AMPL393459515	ACAGAGTAACAGACTAGCTAGAGACAATG	AGCACTTACCTGTGACTCCATAGAA	PIK3CA	chr3	3q26.3	178935994	178936023	178936106	178936131	ex 10	38.6	3	0	1	AMPL393459590	3
AMPL3937473888	ACTTACGAGCAGTTGGCAATTCT	AGACTTGCTCTCAGGGTGTGTA	MKS1	chr17	17q22	56288014	56288037	56288160	56288182	in10-ex11	47.2	2	0	0
AMPL394791857	CACTCATCTCCCTTTAATTTTGGCA	ACAGGGTGTTGATCTTAGAGTCCAA	NF1	chr17	17q11.2	29685378	29685403	29685507	29685532	in54-ex55	26	1	0	0
AMPL394912449	CCCGCTCTCCTCTCCCT	CCACCCGGTCCCCATTC	PIK3CA	chr3	3q26.3	178866301	178866318	178866430	178866447	ex1-in1	77.7	0	0	0
AMPL3951094289	GCGAGCTTGGCTGCTTCT	TGCTCCTGGCTGCGAAA	MDM2	chr12	12q14.3-q15	69201979	69201997	69202086	69202103	ex1	68.5	1	0	0
AMPL3951202842	AACCTTCTGCCTTTGATGTTACAGAT	CCCATGCCTGTCCAATCAGATG	CCND1	chr11	11q13	69467573	69467599	69467710	69467732	3'UTR (ex5)	32.1	3	1	1	AMPL3951202842	1
AMPL396637926	CCTTCTGAAAACTCCCCAGGAA	CACCGAATAGTTACGGTCGGA	CDKN2A	chr9	9p21	21974543	21974565	21974687	21974708	in1-ex1	61.5	1	0	0
AMPL398336788	GTACAAAAATTACCACTTGTACTAGTATGCCT	CAGGGTGTTGATGATGCCTTCTATA	KRAS	chr12	12p12.1	25362674	25362706	25362823	25362848	(3'UTR) ex6	32.4	1	0	0
AMPL401978644	GACGTGCACAACCTCGACTA	CTCGGTCAAACAAGGCCTCA	FGFR3	chr4	4p16.3	1807862	1807882	1808012	1808032	ex14-in14-ex15	70.2	1	1	1	AMPL401978644	1
AMPL402127466	CCAGGGTATGTGGCTACATGTT	ACTTCTCACACCGCTGTGTTC	ERBB2	chr17	17q12	37868145	37868167	37868258	37868279	in7-ex8	56	3	0	0
AMPL4050069285	AGGTCATGAATTGATAGCTAACATTAGG	GCTTGCATCTTGATTTTGCTCTGAT	TAOK1	chr17	17q11.2	27861070	27861098	27861217	27861242	in18-ex19	46.2	3	0	0
AMPL405393692	GACCCAAAGGGCAGTAAGATAGG	TCCCTAGGAGGAACCTCAGTG	FGFR1	chr8	8p11.23-p11.22	38285827	38285850	38285972	38285993	in4-ex4-in3	47.2	1	1	1	AMPL405393692	1
AMPL405549098	GCTCCTCCTCGCCCTCT	TGTCCACAACTTCGGGATAGGA	ERBB2	chr17	17q12	37856521	37856538	37856669	37856691	ex1-in1	79.4	0	0	0
AMPL405668467	GCGCTCCTCCACAGCTC	TGCTCTGGGTCCTCCTCA	RB1	chr13	13q14.2	48878006	48878023	48878134	48878152	ex1 (5'UTR-ex1)	79.3	0	0	0
AMPL405668880	CGTCATGCCGCCCAAAA	CGGCTCTGCTCGCTCAC	RB1	chr13	13q14.2	48878045	48878062	48878185	48878202	ex1	78	0	0	0
AMPL407454677	GGTCCTATTCTAAAAGCCAGAGCTT	GATTAGGGCTGTGTACGTGCT	CDH1	chr16	16q22.1	68853146	68853171	68853291	68853312	in10-ex11	53.7	3	1	1	AMPL407454677	2
AMPL408517815	TGCTAGCAGTCTTGGTACTTTGTAA	TGTATACAGCCTCCCACGCT	CDH1	chr16	16q22.1	68847167	68847192	68847298	68847318	in8-ex9	51.4	3	1	1	AMPL408517815	3
AMPL4102906940	CCTTAGCTCCTACAGAGTTAAAATGCT	TCATGTTTAGAGTTGGGCAGAGG	NCOR1	chr17	17p11.2	16046850	16046877	16046997	16047020	in11-ex11	36.4	2	1	1	AMPL4102906940	1
AMPL410407018	CCTTCGGTGACTGATGATCTAAGTT	AAGTATTTCAATGCCGGTAGGGA	CDKN2A	chr9	9p21	21968171	21968196	21968321	21968344	(3'UTR) ex4-in3	54	1	1	1	AMPL410407018	1
AMPL413262563	AATACCACATATGGTGCTCTTTCTTGT	ATTAGCATGGCTCTGAGAAAGTGTTAT	MLL3	chr7	7q36.1	151882638	151882665	151882736	151882763	ex34-in33	39.4	3	0	0
AMPL4132690726	AAGTTGCTTGTTGTACAGGTACTAACA	ACAAGAAAGAGCACCATATGTGGTATT	MLL3	chr7	7q36.1	151882514	151882541	151882637	151882664	in34	24	0	0	0
AMPL4136609628	CCAGCCTTGCCCCATCAA	AACAAGATATGACAAAGGGAGAGTTGG	ERBB2	chr17	17q12	37873704	37873722	37873812	37873839	ex15-in15	50	3	0	1	AMPL1497150955	3
AMPL416479049	TGTACATCAGTGACTGTGAAAAAGCAA	GCCCAGCTGTGTGTGCT	CHEK2	chr22	22q12.1	29083754	29083781	29083896	29083913	ex16-ex16 (3'UTR)	33	3	0	0
AMPL416616957	AATTTAAGGAGACAATGAACCACAAACA	CCTCTCAGAGTGACATTTTAACCACT	BRCA1	chr17	17q21	41242818	41242846	41242963	41242989	in11-ex11	42.7	1	0	0
AMPL4169361400	GGTGTGTGTAACACATTATTACAGTGGAT	CCTTCATGTTCTTCAAATTCCTCCTGAA	BRCA2	chr13	13q12.3	32945069	32945098	32945210	32945238	ex20	37.5	2	0	0
AMPL4169746987	TAATAAAGCAGGCATAAGTGAATGGT	GCTGTTTTTGTCTCCTCTAGCGT	PALB2	chr16	16p12.2	23649135	23649161	23649270	23649293	in2-ex3-in3	38.5	3	0	0
AMPL417283113	CATATGATTGAAGCAGGTTTGACAAGT	TTTCGTTTCAGTGCCTTCCTCA	MLL3	chr7	7q36.1	151918990	151919017	151919140	151919162	in22-ex22	28.5	1	0	0
AMPL417291333	CTACAAGTGAAGATTCACAGCAGTCT	AAGCACTTTTAACTTTAGTGTTCAAACAT	MLL3	chr7	7q36.1	151919116	151919142	151919261	151919290	ex22-in21	22.7	0	0	0
AMPL420747162	ACCTTCCAAGAGTTTTTGACATGATGTA	TCAGTGATCGCCTCTTGTGAATAAATT	CHEK2	chr22	22q12.1	29115381	29115409	29115506	29115533	in5-ex6-in6	33	2	0	0
AMPL4220686609	ACAAAACGTGATACTATACAACAAAGGG	AGTGTCCACTCAGGAACTCTATTCTATT	CHEK2	chr22	22q12.1	29130357	29130385	29130487	29130515	ex2-in2	56.3	1	1	1	AMPL4220686609	2
AMPL4245006839	CCAACTGCAAGGACGCTGTAA	CAGAGTGGGCAGCGGTA	APOBEC3B	chr22	22q13.1-q13.2	39378369	39378390	39378476	39378493	5UTR-ex1	48.3	3	1	1	AMPL4245006839	2
AMPL428649977	TCATCTCAGTGAAAGGAGTAGGACA	GCAGGTAAAAGAAGCCCTCAATTCT	CHEK2	chr22	22q12.1	29095663	29095688	29095804	29095829	in10-ex10	40.5	2	0	0
AMPL4295242169	GGTGCAGGGAAACCTGGAA	GGCAGGGCACCTTCTTCTG	ERBB2	chr17	17q12	37863334	37863353	37863465	37863484	ex2-in2	39.2	1	1	1	AMPL4295242169	1
AMPL4295306277	GGGAACAAGTATGTCCGAAATGT	CTTGTTTTATGTATGTCTCCTCTTCCCT	TBX3	chr12	12q24.21	115117353	115117376	115117466	115117494	ex4-in3	46.2	3	1	1	AMPL4295306277	3
AMPL4295332466	ACAGTATCCTCGACATTGATTTCTGTT	CTGTCCCACAGCTTTAGCAAATT	RB1	chr13	13q14.2	48951013	48951040	48951123	48951146	in12-ex13	33.7	1	0	1	AMPL3665288574	1
AMPL4295334940	GGAACTAACTTTTCGTCCAAGCC	GGGCACCGAGATGGTCATTA	TBX3	chr12	12q24.21	115120500	115120523	115120629	115120649	in1-ex1	52.3	2	1	1	AMPL4295334940	3
AMPL4295433244	GTTGATAGAGTGGTAGACCTTGCT	CCAAATGGAGTGTTGCTGAGGT	RAD51C	chr17	17q22	56774145	56774169	56774288	56774310	ex3-in3	61.6	3	1	1	AMPL4295433244	2
AMPL4295511778	ATTAAAGTTTTCATATGTAAGACACGAGACACT	GACTGAAACAGCAGAGCTTCCT	PALB2	chr16	16p12.2	23640471	23640504	23640575	23640597	in6-ex6	40.3	3	1	1	AMPL4295511778	3
AMPL4295545630	CCTCCACCGGCGGTTAT	CCGCTTCCTAGAAGACCAGGTA	CDKN2A	chr9	9p21	21994014	21994031	21994134	21994156	in1-ex1	51.9	2	1	1	AMPL4295545630	3
AMPL4295548351	GGACTTTTCGAGGGCCTTTCC	GAGGGTTTTCGTGGTTCACATC	CDKN2A	chr9	9p21	21994114	21994135	21994249	21994271	in1-ex1	70.4	1	1	1	AMPL4295548351	2
AMPL4295590370	CTATCCCCTCCTCAGCTAGCA	ATAGATTTTAAGACTTCAAAACGACACAAAGAG	FOXM1	chr12	12p13	2968805	2968826	2968907	2968940	ex10-in9	47.6	3	1	1	AMPL4295590370	3
AMPL4295596072	TTCAAATGTGTGCAGAAGGAGGT	CTTCAAAGTTCTAGCGGGAGAGAAG	CCND1	chr11	11q13	69456214	69456237	69456362	69456387	ex1-in1	61.9	1	1	1	AMPL4295596072	1
AMPL4295780118	CCGCAGGCCTCTGAGTC	CGCCACCGAGTTGAGTTT	ZNF703	chr8	8p11.23	37554608	37554625	37554743	37554761	in1-ex2	67.2	1	1	1	AMPL4295780118	1
AMPL4295844213	CTTCTTCGAACTTTTAGGAAGCTCAGT	GCTGGGATTGACTTCTTGCTCAA	ZNF217	chr20	20q13.2	52199514	52199541	52199657	52199680	ex1-5UTR	41	3	1	1	AMPL4295844213	3
AMPL4295854898	GTTGTTATCCCTATCATTATCATCACCATCT	GGAGAGGGAGAAGTGCTAAAGTCA	VEGFA	chr6	6p12	43746549	43746580	43746666	43746690	in4-ex5-in5	37.1	3	1	1	AMPL4295854898	3
AMPL4295867623	ACATGTGAAACTAAACCCAGTGAACA	CCTTACTGGGACACTCAGATCCA	TOP2A	chr17	17q21-q22	38548157	38548183	38548263	38548286	in32	32.1	1	1	1	AMPL4295867623	1
AMPL4295868277	TGTAGCCAGGATTAGAACCCAGT	GCTTGACACATTTAGAATTGGTTGTC	TOP2A	chr17	17q21-q22	38548241	38548264	38548386	38548412	in32-ex32-in31	35	2	1	1	AMPL4295868277	1
AMPL4295885965	CGGCCAGAAGCCTGACTG	GACCACCTGGAGCCCTTT	FOXM1	chr12	12p13	2983039	2983057	2983166	2983184	in2-ex2	54.5	3	1	1	AMPL4295885965	3
AMPL4295895910	CTGAGGAAGGCATGGTTCGT	ACCCAAGATGAAATAAAACGTCTCTCTT	FGFR2	chr10	10q26	123239404	123239424	123239547	123239575	ex18-in17	45.2	3	1	1	AMPL4295895910	2
AMPL4295913808	CAAGCTGGGCTGGGTGT	GCTTCCTCTCGCCCATCA	FGFR1	chr8	8p11.23-p11.22	38271172	38271189	38271325	38271343	ex18-in17	65.7	1	1	1	AMPL4295913808	1
AMPL4295926862	AGCAAGCTTCAAAACTGTCTTCCT	TCTTTGTAACAGAGGATCCTTGGGTTA	EMSY	chr11	11q13.5	76256713	76256737	76256856	76256883	in19-ex20	38.3	2	1	1	AMPL4295926862	2
AMPL4295983581	TCTCACATTGTTTCAAAACTGGAAATGG	TGTGGGTAGCAATAATCTAAACCTCTTG	TOP2A	chr17	17q21-q22	38559100	38559128	38559237	38559265	in20-ex20	46.4	1	1	1	AMPL4295983581	1
AMPL4296058622	AGGCCATTATCTCTGATGCTTTTT	CTCTGAAGTTTGATTCTTTCCGCTAAAC	MAP3K1	chr5	5q11.2	56174745	56174769	56174846	56174874	in10-ex11	37.2	3	1	1	AMPL4296058622	3
AMPL4296063350	CGTGGAACATTCTGTATTCATCTGCTAT	CCTAAGAATATGCTAACAATTTTACTCTAAGCA	MAP3K1	chr5	5q11.2	56161182	56161210	56161298	56161331	ex5-in5	33.7	1	1	1	AMPL4296063350	1
AMPL4296066331	GTTCGACAAGCTGCCAATAAAGATAG	AGGAATTTCCATCTTGCTCTCAAAGT	ARID1B	chr6	6q25.1	157527624	157527650	157527772	157527798	ex19	53.7	1	1	1	AMPL4296066331	2
AMPL4307303330	CACCTTCTTCATGACAAAAGCAACA	GGAGAGGAATGAAATGGAAGAAGTGG	MLL3	chr7	7q36.1	151845784	151845809	151845931	151845957	ex52	39.3	1	0	0
AMPL4307313828	CCCCTTAGGGATTACAATATGAATGCT	CCAAGCCAGATGAGCTGAAGG	MLL3	chr7	7q36.1	151845905	151845932	151846032	151846053	ex52	47	2	0	0
AMPL4313796622	CCCAGCTCTGTTTCCCTCT	GCCCCTCCTTTAGGACCTAGAT	MLL3	chr7	7q36.1	151876858	151876877	151876997	151877019	in37-ex37	40.8	1	0	0
AMPL4319994100	CGCACAAATGCCCGGATG	TCGGCTTCTTGCTCCATCTTT	MDM2	chr12	12q14.3-q15	69201902	69201920	69202022	69202043	5'UTR-ex1	77.5	0	0	0
AMPL433098497	CCAGAGGAAGAATTATAACCCAGAAACA	TTTTCCCATTCACTTCATATGATCTGGATT	RAD51C	chr17	17q22	56811566	56811594	56811690	56811720	ex9	29.9	2	1	1	AMPL433098497	1
AMPL434499041	TGAGACAACAGAAGCATTATACTGCTTT	CTAACTGGAGTGTGTGGAGGAAT	RB1	chr13	13q14.2	48942570	48942598	48942717	48942740	in10-ex11	31.1	2	0	0
AMPL4347527835	CCCCGAGCGTGAGTAGA	CGATCGCAGGCGAACTCC	PIK3CA	chr3	3q26.3	178866384	178866401	178866525	178866543	in1	78.2	0	0	0
AMPL4353862894	CCTCGGCTTCCCCTTCAC	TGGAAGCATATTGAGGAACTTTGATAAT	CHEK2	chr22	22q12.1	29083932	29083950	29084030	29084058	in15-ex16	38.8	1	0	0
AMPL4388397190	AATGTTATGAAAATGATCAGTTCATTTCATCTT	GCGACTTCCAACATTCTTCATTGTATTT	INPP4A	chr2	2q11.2	99203842	99203875	99203956	99203984	in25-ex26	37.8	1	1	1	AMPL4388397190	1
AMPL4388397269	GCACATCATCACCAATGACATCA	GCTGTGAGCTCATACCTGGAG	INPP4A	chr2	2q11.2	99136490	99136513	99136643	99136664	ex3-in3	67.9	1	1	1	AMPL4388397269	1
AMPL4388399209	AACAAAGTATCATTCCTTCCTCCACAG	TGGACACTGTCCTGAATCTCAATG	TERT	chr5	5p15.33	1297325	1297352	1297459	1297483	genomic region TERT promoter	52.8	2	1	1	AMPL4388399209	2
AMPL4388403009	ACATGTTTCAGCACACACTGAGA	TCTGTGACCACCTGTTATCCCAT	TERT	chr5	5p15.33	1297437	1297460	1297582	1297605	genomic region TERT promoter	59.3	2	1	1	AMPL4388403009	2
AMPL4392179183	GTCGAAAAGTGTTTCTGTCATCCAAA	CAGATAGCGATGGTGAGCAG	TP53	chr17	17p13.1	7578209	7578235	7578362	7578382	in5-ex6	58.3	1	0	1	AMPL706125298	1
AMPL4459254198	CCCATGCCTCCATGAGCTG	AGTTGAGTCATAAGCCAAATGTACTTCT	NCOR1	chr17	17p11.2	16049817	16049836	16049960	16049988	in9-ex10	27.4	1	0	0
AMPL4462373302	CTCTGTGGAGAACCTTTGGGAAA	CTACAAGGAGCTCTAGCAACCC	ARID1A	chr1	1p35.3	27105373	27105396	27105519	27105541	in19-ex20	42.3	3	0	0
AMPL4463489558	GGAAACCCTAAGAGGTGACTCTGA	CCCATCACCTCATTCAGGTACAG	NCOR1	chr17	17p11.2	15942616	15942640	15942740	15942763	ex44-in44	34	3	0	0
AMPL4574207192	CTGGAGGGCCACTGACAAC	GCATCTTATCCGAGTGGAAGGAAATT	TP53	chr17	17p13.1	7578114	7578133	7578247	7578273	ex6-in6	53.5	1	0	1	AMPL387841166	2
AMPL4576337466	GGTCAACAGTGGATGAAAAAGAACA	TGCCATCTTCATTTGTCCCAATTAGA	MAP2K4	chr17	17p12	11998899	11998924	11999047	11999073	ex4-in4	37.4	1	0	1	AMPL737718679	1
AMPL4578091067	ATTTAGAAGTTCTTGTGAACCACAGAT	AAGTTTTTCTCCATAACATTGGGTCTGA	MAP3K1	chr5	5q11.2	56161105	56161132	56161241	56161269	in4-ex5	38.5	1	0	1	AMPL4296063325	3
AMPL4579263079	AGGAAAGTAAAGTTCCCATATTAATGGTT	GTGCAGGACCATTCTTTGATACAGATA	KRAS	chr12	12p12.1	25398026	25398055	25398150	25398177	in2	30.5	0	0	0
AMPL4608742149	GGTAACATCCACCCAGATCACT	GGAGATGTTGCTTCTCTTAATTCCTTG	EGFR	chr7	7p12	55242331	55242353	55242461	55242488	in18-ex19	48.1	2	0	0
AMPL461256191	GGGAGGCTATTCTGCCCATTTG	AAAGGCAAGTGGACTTCGGT	MYC	chr8	8q24.21	128748752	128748774	128748875	128748895	ex1-in1	56.9	3	1	1	AMPL461256191	3
AMPL464273495	ATCTCAACTGAATGGAATGAACGACA	AAGCTGTGTTACTTCAAAGGAGGTTTAT	PIK3R1	chr5	5q13.1	67576798	67576824	67576901	67576929	ex7-in7	35.9	3	1	1	AMPL464273495	3
AMPL4688587319	ATCTGTTGTTTTCACCTTAAATCTCTCA	ACATTTCCTTCCAATACGATGGCA	ADAMTS16	chr5	5p15	5222804	5222832	5222922	5222946	in10-ex11	28.9	1	0	0
AMPL4688589136	GGACATCTGTAAAGCCCTGTGG	CATGGGTTGAAAGACTAGCATCTGAATA	ADAMTS16	chr5	5p15	5222901	5222923	5223026	5223054	ex11-in11	44.7	3	0	0
AMPL470763028	AATAAAATAACTGGCAAATATATCATTGAGCCA	CCTTTCTTAAGACCACCCTCTGAA	MYC	chr8	8q24.21	128753640	128753673	128753753	128753777	3'UTR	43.2	2	1	1	AMPL470763028	2
AMPL4981177402	TGTGCAGGGTGGCAAGT	GCCTCATCTTGGGCCTGT	TP53	chr17	17p13.1	7577472	7577489	7577620	7577638	in6-ex7-in7	53.4	2	0	1	AMPL387805586	3
AMPL5027724664	GCCTTTTTCATGTTAGATGGGATCCT	AGTTTGAGCTGATGATTTAAGACAGTGT	MET	chr7	7q31	116403194	116403220	116403338	116403366	ex11-in11	32.2	3	0	1	AMPL404057818	2
AMPL5100539472	TCAGAACAAGAAGATACTAAACCCTCC	GTTGTTGATGAGTTCTTTGGTTTTCTGT	TBX3	chr12	12q24.21	115107973	115108000	115108118	115108146	(3'UTR)-ex8	33.1	2	0	1	AMPL4295986051	1
AMPL5235056723	CCTCGGACTGCAGAGCTA	ACTTGAGCAACCCGGAGTC	TERT	chr5	5p15.33	1296101	1296119	1296226	1296245	genomic region TERT promoter	66.4	1	0	0
AMPL5235087776	TGAGGACTTCCCAGGAATCCA	GGCAGTTTCTGAAAGTAGGAAAGGTT	TERT	chr5	5p15.33	1296206	1296227	1296350	1296376	genomic region TERT promoter	51.2	1	0	0
AMPL5315655094	CTACCCATTTTCCTCCCGCAA	ACTGAGGCTCTTTAGCTTCTTAGGA	BRCA1	chr17	17q21	41215903	41215924	41216026	41216051	in16-ex17	37.3	3	0	1	AMPL1481313993	3
AMPL535339604	TTCATTTAATTTTCCTCTAAAATGTTCCTCTGT	ACACTCTGCACAATTCCATGGATT	NF1	chr17	17q11.2	29685445	29685478	29685566	29685590	in54-ex55	33	3	0	0
AMPL5355186186	ACAATGTACACATGTAACACCACAAAGA	ACCTTCACAAACTTTGGTGTATGAAAC	BRCA2	chr13	13q12.3	32900250	32900278	32900394	32900421	ex5-ex6	27.6	1	0	1	AMPL574223771	0
AMPL551010179	GACAAATCGCTCCATATCACAGTTG	GGACACATGCAGGTACCAGATAG	CASP8	chr2	2q33-q34	202137554	202137579	202137705	202137728	in6	33.3	2	0	0
AMPL564735788	GATATGTTTGCTGCAGGGCCTATA	CTCTTGATTCAGCTTACCTCTTTCATAGT	MDM2	chr12	12q14.3-q15	69207261	69207285	69207396	69207425	in2-ex3	33	2	1	1	AMPL564735788	1
AMPL565841541	ATTTCTGTTACAATTAAAAGATACCTTGCTTGT	GCAGGCATACTAATTTGAACAGAAACCT	NF1	chr17	17q11.2	29685926	29685959	29686072	29686100	in55-ex56-in56	32.7	2	0	1	AMPL3767333280	1
AMPL5685038101	TTCCAAAAATGGGCGGAGGA	CGGCGGATGCCTCCTTT	RPPH1	chr14	14q11.2	20811223	20811243	20811338	20811355	ex1	56.8	0	0	0
AMPL570903160	TGTTGTGAAGTTTCAGAGTGGCA	CTCCTCCAATCAGGAAAGAGTTAGG	MAP3K1	chr5	5q11.2	56160551	56160574	56160695	56160720	ex4	53.3	1	1	1	AMPL570903160	2
AMPL5763611983	CCAGTCCCAAAGTGCAGCTT	TGAACATATTTTTGTCAGGGAGCTCA	CDH1	chr16	16q22.1	68845535	68845555	68845680	68845706	in6-ex7	52	3	0	1	AMPL1263382818	3
AMPL6083329467	GTAGGTCTTGGTTTCGCACCTT	GTGAGAATATCATCGCCTCTGAAATACA	CASP8	chr2	2q33-q34	202151035	202151057	202151171	202151199	in9	39.5	3	0	0
AMPL6091159178	TGCTGGCTCAAAACGACTTTAGT	AGGAAGGAGAGATGACGGTGAG	CASP8	chr2	2q33-q34	202098608	202098631	202098711	202098733	in1	62.5	3	0	0
AMPL618818303	CGCCGCCTACGAGTTCAA	GCGGGTGCAGTAGCATCAG	ESR1	chr6	6q25.1	152129218	152129236	152129368	152129387	ex1	74.2	0	0	0
AMPL618818857	CTCAACAGCGTGTCTCCGA	CCTCGCGCACCGTGTAG	ESR1	chr6	6q25.1	152129345	152129364	152129460	152129477	ex1	69.8	1	0	1	AMPL4305145671	2
AMPL6216846092	GGCTTTTATTAGGCTAGCAACGAAGA	GTGCAGCCCCCAGCTATT	SF3B1	chr2	2q33.1	198299641	198299667	198299796	198299814	in1-5'UTR	56.6	1	0	0
AMPL622910927	ACTGAAATTTACACTTACTAGGCAAAGA	GGTGTACATAAAGCTTCAAATGGCAATAA	PALB2	chr16	16p12.2	23614366	23614394	23614502	23614531	3'UTR	27.5	0	1	1	AMPL622910927	0
AMPL6254599603	CGCTAGCCAAGCTGCTG	GCTTCTCGCTCCCTCCATCT	SSTR2	chr17	17q24	71161329	71161346	71161482	71161502	ex1(5'UTR)-in1	62.5	0	0	0
AMPL626072875	AGAATGCTTAATCTTTTCAGCTCTTTGG	CCTTCAGGTAAGTGAATCGTATTCTCAA	PALB2	chr16	16p12.2	23649241	23649269	23649369	23649397	ex2-in2-ex3	32	2	0	0
AMPL6326144323	GCCTCACAACCTCCGTCA	AACTCTGTCTCCTTCCTCTTCCT	TP53	chr17	17p13.1	7578407	7578425	7578558	7578581	in4-ex5	61.7	1	0	1	AMPL707393388	1
AMPL6363973341	GAACGCAAGTCCCGCTT	GGACCCACCTGCTCCAT	STARD3	chr17	17q11-q12	37793333	37793350	37793475	37793492	ex1(5'UTR)-in1	72	0	0	0
AMPL637665880	AGCTCTCTTGAGGATCTTGAAGGAA	AAATATACAGCTTGCAAGGACTCTG	EGFR	chr7	7p12	55241655	55241680	55241800	55241825	ex18-in18	60.8	1	0	0
AMPL651219895	CGACGGGAAGACAAGTTCATGT	CTGTCCTTATTTTGGATATTTCTCCCAA	PTEN	chr10	10q23.3	89717672	89717694	89717794	89717822	ex7-in7	39	3	0	1	AMPL1740838243	2
AMPL651240522	AGACAAAGCCAACCGATACTTTTCT	ACGTAAACACTGCTTCGAAATAATACAT	PTEN	chr10	10q23.3	89720839	89720864	89720984	89721012	ex8-in8	32.5	1	0	0
AMPL651427926	AGAACACCACGAAAAAGTAACCTTGAT	AAGAAACGTGAACAAATCTGAAACACTA	RB1	chr13	13q14.2	48942676	48942703	48942793	48942821	ex11-in11	28.9	0	0	0
AMPL651784712	AGCCTGTCTTCATAGTGATGACAAC	AGGGTCCCCATTGGCATTC	GATA3	chr10	10p15	8111361	8111386	8111503	8111522	in4-ex5	63	3	0	0
AMPL653367906	CACAACCACACTCTGGAGGAG	ATGGTGAGCGATTCACTTGGA	GATA3	chr10	10p15	8111483	8111504	8111636	8111657	ex5-in5	54.5	2	0	0
AMPL657607869	GCGTCAGCAGATCCCAGT	GGCCCTGGCTCTTCTGTA	NOTCH4	chr6	6p21.3	32163774	32163792	32163930	32163948	ex30	73	1	0	1	AMPL4295503531	1
AMPL6614550135	GTCTTTTGCAGGCACAGCTT	TCCACGCTGGCCATCAC	EGFR	chr7	7p12	55248839	55248859	55248994	55249011	in19-ex20	55.6	2	0	0
AMPL6659157342	GTGCTTTCTCGGGAATCCTGAA	ATAAAGAACCACTGTCACTTTTGAATATAACA	MLL3	chr7	7q36.1	151848076	151848098	151848169	151848201	in50	26.8	0	0	0
AMPL6677035272	CCTGGCGCTGCTTTAACCTA	CCTAGGAAGAGGCGATTCAACAC	MLL3	chr7	7q36.1	151833746	151833766	151833858	151833881	3'UTR	34.8	3	0	0
AMPL6738961545	TGAAGAGAGCAATGAAACTTACAAATCCA	CCCGAAATGCCAAAGAGGATGTA	TBX3	chr12	12q24.21	115118662	115118691	115118786	115118809	ex2	49.5	3	0	0
AMPL6794906339	GAACCGGCTCCCGATCA	GTCGCGGTGGGAGGAAT	ZNF703	chr8	8p11.23	37553632	37553649	37553776	37553793	ex1-in1	71.7	1	0	1	AMPL3709542880	1
AMPL6794906530	GTCGCAGTTGGCCACAC	GCTGATGGCTGTGCCAGTT	MKS1	chr17	17q22	56296720	56296737	56296857	56296876	(5'UTR)ex1-in1	59.2	1	0	0
AMPL6794906566	GATGCAGTAAGAGAGCTGGACAA	CTGCATAAGGAAAGAAACCAAAAGTGAA	TAOK1	chr17	17q11.2	27822641	27822664	27822779	27822807	ex11-in11	39.1	2	0	0
AMPL6794908455	GCAAAATAAAACCGTAAAGCAAGCA	TCAAGTATGTTTCAGTACCACTCCTCT	MDM2	chr12	12q14.3-q15	69239188	69239213	69239330	69239357	(3'UTR)	31.6	3	0	0
AMPL6794909595	GTGGGACTGGCACTGACT	TCATCGAATTTGTACCAAGGCATGA	APOBEC3B	chr22	22q13.1-q13.2	39382201	39382219	39382350	39382375	in3-ex4	53.4	1	0	1	AMPL4388401207	1
AMPL6794917937	GCCCATGCCTTGCTCTCTTT	TCCTCCCCACAGTTCTGAAGA	VEGFA	chr6	6p12	43742048	43742068	43742200	43742221	in1-ex2-in2	58.3	2	0	1	AMPL4295861972	2
AMPL6794920029	TCTCATTGTCATTATTTGCGGAAGGT	CTGAGCAATCGCTATGTCCTGA	E2F3	chr6	6p22	20490276	20490302	20490415	20490437	in6-ex7	29.2	1	0	1	AMPL3333251692	1
AMPL6794926284	ATGGACCAGCAGTAGAAGCAC	GTGTTGAGAAAATACAACCTGGAAACC	TAOK1	chr17	17q11.2	27822711	27822732	27822840	27822867	ex11-in11	34.3	3	0	0
AMPL6794930884	GGCAAAGGCGACTCTGAAGA	CAGCTTGATGTTCCGGTGACT	ARID1B	chr6	6q25.1	157527856	157527876	157528008	157528029	ex19	53.8	2	0	1	AMPL548966253	2
AMPL6794940198	CACCTCATCACGCTGAACATAGA	CCACAGATTTCGATGCACCAAC	MLL3	chr7	7q36.1	151845416	151845439	151845568	151845590	ex52	38.8	1	0	0
AMPL6794941417	GGTACTGGGTGGCTGTTTTGTAAA	AGTCTGGTTCAGATACACCAAGTAGT	MLL3	chr7	7q36.1	151879434	151879458	151879532	151879558	ex36	47.3	3	0	0
AMPL6794947765	CTTGGTCTTCTTGGCAGCATTT	AACAAAGTACAACCACCCTTTCCA	TSN	chr2	2q21.1	122519018	122519040	122519156	122519180	ex4-in4	39.7	3	0	0
AMPL6794948133	CCATGTCTGTGAGCGAGATCTT	GAAGTGGCCCAACTAGGCAT	TSN	chr2	2q21.1	122513354	122513376	122513458	122513478	ex1-in1	63.4	3	0	0
AMPL6794948948	TTCCCCATTCCCTTTGCCTT	GGGAGTGCCTAACCTAAAGCTAGA	TSN	chr2	2q21.1	122513436	122513456	122513544	122513568	in1	70.5	3	0	0
AMPL6794952927	GCATGGACAGGTCCAGGTA	CGCATCGTGGCCTTGAC	FGFR1	chr8	8p11.23-p11.22	38271301	38271320	38271445	38271462	ex18-in17-ex17	68.8	1	0	1	AMPL410561093	1
AMPL6794952972	TCAGGTCTATCCCAGGAGGTG	CGTGATTAGAGGGATAGAGGAAAGG	MRM1	chr17	17q12	34964346	34964367	34964473	34964498	ex4-in4	62.3	2	0	0
AMPL6794954299	GGTTGCCTGGGTTTATGCTATCA	TTGGAGCTTTGCTGCTGTTATAAGA	PALB2	chr16	16p12.2	23640548	23640571	23640697	23640722	in5-ex6	37.3	3	0	1	AMPL4295517176	1
AMPL6794954756	CATACAAGGTCATTTGCTGTGTTTGT	CTCAGGTGCCATAAATGCAATTGT	MAP3K1	chr5	5q11.2	56183173	56183199	56183323	56183347	in17-ex18	48.4	2	0	1	AMPL4295625600	2
AMPL6794962274	GAAGGCTGGAGCTAGGAGAAAG	CGGCCATAAGCTTTGAAACTTGG	E2F3	chr6	6p22	20480084	20480106	20480235	20480258	ex2-in2	42.6	2	0	1	AMPL4295963474	2
AMPL6794963294	GGCGGAGGAGCCTTTTAGATG	CCCACGATCCCGTTAGGAA	EMSY	chr11	11q13.5	76156132	76156153	76156287	76156306	(5'UTR) ex1-in1	71	1	0	1	AMPL4295942169	1
AMPL6794968448	CTGTTGGTGCACAAAAAGACACT	CAAACGACCACAAAATTAAATGTTGCT	MDM2	chr12	12q14.3-q15	69207371	69207394	69207518	69207545	ex3-in3	33.9	3	0	1	AMPL1500218300	1
AMPL6794971662	ACCGTAGCTGCCCTGGTA	AACAATGGTTCACTGAAGACCCA	TP53	chr17	17p13.1	7579363	7579381	7579512	7579535	ex4 (intraexonic)	66.4	1	0	1	AMPL651471124	2
AMPL6794973416	CCATCCCAGTTCTGATTCTGCT	CACCACTGAGCTACCAAGGTTT	CDH1	chr16	16q22.1	68862068	68862090	68862218	68862240	in13-ex14-in14	53.1	3	0	1	AMPL408403101	2
AMPL6794976200	GGGAATCCTGAATCGAGCTG	AGAACTGGCGAGAAGGAAATGG	RARA	chr17	17q21	38465457	38465477	38465606	38465628	ex1(5'UTR)-in1	62.8	1	0	0
AMPL6794980983	CTGTCTAGGCTTGCGGTTCT	TCATTGATGAAGGTGGAGATGTGG	TSN	chr2	2q21.1	122522611	122522631	122522759	122522783	in5-ex6	53.1	2	0	0
AMPL6794981319	TGGTCACATCTCTCACCTCATCT	GGCAGTATTCGGGTTGTAGGA	MET	chr7	7q31	116435664	116435687	116435814	116435835	in19-ex20	46.5	3	0	1	AMPL4295567333	3
AMPL6794985525	CACGTCTTTGTCTCTAGTGCAGT	GAGCAAGGATTCAATGGAGAAGGA	VEGFA	chr6	6p12	43754089	43754112	43754239	43754263	3UTR	25.2	1	0	1	AMPL1560825852	0
AMPL6794985818	CCCTACCCATTGCAGACCAAA	CCACAAGACCAAGTCCCTGA	VEGFA	chr6	6p12	43746611	43746632	43746756	43746776	ex5-in5	54	2	0	1	AMPL1511195964	2
AMPL6794986118	CAGACCCCTGACTATGAAGAAGGA	GGGCGAGATGTGGCTCA	GATA3	chr10	10p15	8115707	8115731	8115861	8115878	ex6	50.8	3	0	1	AMPL653339849	2
AMPL6794986624	CCCTTCTGGCTTTTATGTCTGTGA	CCTATAGAATGGTGGAGAAAAGAGAAACA	NF1	chr17	17q11.2	29557691	29557715	29557831	29557860	in23-ex24	35.3	2	0	1	AMPL3510163540	1
AMPL6794992374	GGCCGAGCAGGTGAGTC	AGGTGCCTGCGGAAAACA	ADAMTS16	chr5	5p15	5140643	5140660	5140764	5140782	in1	77.9	0	0	0
AMPL6794992775	CCGTCTCACCGCGATGTC	CTTACCGCCCTTTTCCATCCA	ADAMTS16	chr5	5p15	5140742	5140760	5140863	5140884	in1-ex2	77.7	0	0	0
AMPL6794994876	AAGCCACACAGAGCTGCTT	TCCATACGGCGGCTGTC	ARID1B	chr6	6q25.1	157519834	157519853	157519991	157520008	in15-ex16	47.1	1	0	1	AMPL3697201336	2
AMPL6794996847	CTGGTGCCAGCTGCAAG	CGCTGTCGCAGGTGAAA	STARD3	chr17	17q11-q12	37818984	37819001	37819116	37819133	in14-ex15	64.3	1	0	0
AMPL6794998986	GTGGCCTGTGCCCACTATA	TCTGCAGAAAAGACCGTTGG	ERBB2	chr17	17q12	37873588	37873607	37873739	37873759	ex15-in15	62.1	1	0	1	AMPL403101756	2
AMPL6794999911	GCATAAAGGATGAAGAGGAACAGATGT	GCTCAGAGAGCAACTGTGTTGA	MAP3K1	chr5	5q11.2	56167736	56167763	56167888	56167910	ex7-in7	45.6	1	0	1	AMPL4295630685	2
AMPL6795001817	TGCTGTCATCCTTTTCAGATTCTGG	CGCTCTGCGTAGTAACTCACTTG	INPP4A	chr2	2q11.2	99169190	99169215	99169339	99169362	in14-ex15	46.8	1	0	1	AMPL4388405337	2
AMPL6795003971	GGTTGGCTGAGGTCCAAGTAT	CAATACCCACATCTCAAGAGTTTGTG	FGFR2	chr10	10q26	123239513	123239534	123239661	123239687	ex18-in17	41.7	3	0	1	AMPL3474023145	2
AMPL6795006650	GCATACTGCTGGGAAAACTTTGT	CCTCAGGAGGATGAGCAGGT	APOBEC3B	chr22	22q13.1-q13.2	39382308	39382331	39382456	39382476	ex4-in4	47.2	2	0	1	AMPL4311570124	2
AMPL6795009397	CTGGGCTGAGCCCTCTG	CGGCCAGCCACGTTATAGA	ERBB2	chr17	17q12	37863434	37863451	37863577	37863596	in2	46.8	1	0	1	AMPL4132276970	1
AMPL6795014372	GTGGGTGCACCTGTTACTGT	AGAGCACATGACGAAACCCATC	RARA	chr17	17q21	38513824	38513844	38513956	38513978	ex9(3'UTR)	51.8	2	0	0
AMPL6795014937	CGACATGCTGGGCCTCTC	GGTTCAACCAGAAGGATGCCAAA	INPP4A	chr2	2q11.2	99136592	99136610	99136743	99136766	ex3-in3	61.7	2	0	1	AMPL4388399369	3
AMPL6795016229	GATTCAGCCTGTTTGGCGTT	CATAGCCAAGATGTGCAAATTGTCT	CCND1	chr11	11q13	69467682	69467702	69467821	69467846	3'UTR (ex5)	43.7	3	0	1	AMPL1495431382	3
AMPL6795020450	TTCCTCCCCAGGCTGGAT	CCGTTGGTTCACCTTATCTCTGT	FOXM1	chr12	12p13	2968689	2968707	2968840	2968863	ex10-in9	49.6	2	0	1	AMPL4295587721	3
AMPL6795020830	GGATGTTGGCCCAGTGCTAGA	ACAAGTGTGTCTGGAGCACAG	NOTCH4	chr6	6p21.3	32171728	32171749	32171870	32171891	in19	64.5	2	0	0
AMPL6795022309	CTCCCACACCAATGCCTGA	GTTCAGCCTCTTAGATACGCTTGT	APOBEC3B	chr22	22q13.1-q13.2	39378289	39378308	39378434	39378458	5'UTR	54.8	2	0	1	AMPL4311556825	2
AMPL6795022347	GAAGCAGCGACCGTCTGA	CCGTCTTCCGGTCCACA	IGFBP4	chr17	17q12-q21.1	38612591	38612609	38612741	38612758	in3-	62.1	1	0	0
AMPL6795025796	GGCTCTCCATGGTCTGCTT	GACGTGGACGAGTGTCTGG	NOTCH4	chr6	6p21.3	32171850	32171869	32171997	32172016	in19-ex19	62.5	2	0	1	AMPL657543895	2
AMPL6795028527	CCCGAGGGCAAATACAGCTT	CACATCCACCCAAAGACTCTCC	EGFR	chr7	7p12	55221797	55221817	55221930	55221952	ex7-in7	60.2	3	0	1	AMPL4295964778	3
AMPL6795029525	CTCTGTATTTCACCCAACTGCGA	CTGCCTCGGGACAGGTAA	FGFR1	chr8	8p11.23-p11.22	38275586	38275609	38275741	38275759	in10	42.4	0	0	1	AMPL2820991798	3
AMPL6795030104	GAGGCCCCCACTGCTTA	CCCAGGCGCATCTGAGG	TBX3	chr12	12q24.21	115120599	115120616	115120741	115120758	in1-ex1	55.2	3	0	1	AMPL3493168149	3
AMPL6795030229	GGTCTTACAAGCTTGACTCTTGTTCT	CCCACTTAGGATGAGTTACGAATTCT	LAP3	chr4	4p15.32	17608910	17608936	17609058	17609084	in12-ex13	41	2	0	0
AMPL6795031458	ACAATGCCGCCATCGCTTA	CACATTTGTCCTCCACACCCT	CDH1	chr16	16q22.1	68845641	68845660	68845784	68845805	ex7-in7	53.2	3	0	1	AMPL3665048636	3
AMPL6795032877	GACAAGACTGAGTAAATGTGTGTGACT	CACTGGTTTGGGTAAGATTTTACTTGG	EMSY	chr11	11q13.5	76224326	76224353	76224458	76224485	in9-ex10	34.3	3	0	1	AMPL4295237153	1
AMPL6795035115	TGTTGAGTGCCAAGGCCAT	TGGCGCCTTCGCATGAA	EGFR	chr7	7p12	55240608	55240627	55240754	55240771	in16-ex17	62.2	2	0	1	AMPL3659173907	2
AMPL6795041607	GGGCGACAGCTGACTTG	CGAGGGATTGGGTACTGGAT	MET	chr7	7q31	116312534	116312551	116312653	116312673	ex1-in1	63.7	2	0	1	AMPL4295579537	2
AMPL6795045385	CGGACTTGCCTGCGTGA	TGGAGGACCTCATCAACTCACA	NOTCH1	chr9	9q34.3	139393440	139393457	139393592	139393614	in32-ex32	68.1	1	0	1	AMPL3298927400	2
AMPL6795047862	TGGCTCATTGTTACATCCCATGAA	TGTCTGTGATCTTGTCCAGGACT	ESR1	chr6	6q25.1	152415429	152415453	152415580	152415603	in6-ex7	51.2	3	0	1	AMPL4295302263	3
AMPL6795051366	CTTCTGCACTGGCAGCTC	TGATGCTTTTCTCTTGCTGCTCTT	ARID1B	chr6	6q25.1	157527721	157527739	157527871	157527895	ex19	56.8	1	0	1	AMPL4310685450	3
AMPL6795052845	GCAGGAGAAGAGAGGTCAGTC	GCCCCAGCAACCCATGATAC	NOTCH1	chr9	9q34.3	139438565	139438586	139438689	139438709	in1	71.8	2	0	1	AMPL3317685123	2
AMPL6795056035	CTGCCGTCATTTCTTGTGCTT	CCGTGTGTTCACGTTTCAACT	INPP4A	chr2	2q11.2	99203905	99203926	99204058	99204079	in25-ex26	44.7	2	0	1	AMPL4388402045	3
AMPL6795056808	CTGCGCCCTGTTACCTGT	AGGACCCTGCCTGAGAGT	EMSY	chr11	11q13.5	76156053	76156071	76156179	76156197	(5'UTR) ex1-in1	60.2	3	0	1	AMPL4295941265	3
AMPL6795059250	GCACCTAGACAAAACATGGCCATA	CCACTGGACCCAGGGTCT	FOXM1	chr12	12p13	2974394	2974418	2974547	2974565	in6-ex6	52.7	1	0	1	AMPL4295880923	3
AMPL6795065989	TTAAAGCAGAATCCTTACCTGTTGAAGA	CCTATACCTGGGCAAGGCTACTT	NCOR1	chr17	17p11.2	15938061	15938089	15938179	15938202	ex45-in45	58.9	2	0	1	AMPL4296035078	2
AMPL6795073866	GCTACTTCCACCGCTCCTT	GGTAACCCGCAAAGCCTGA	NOTCH4	chr6	6p21.3	32163878	32163897	32164022	32164041	ex30-in29	64.8	2	0	1	AMPL4295507465	3
AMPL6795075395	GGAGCAGCCTCTGGCATT	TCTGACTGCTCTTTTCACCCATC	TP53	chr17	17p13.1	7579475	7579493	7579595	7579618	in3-ex4	52	2	0	1	AMPL387829477	3
AMPL6795077818	TTTGCTCATCAACAACTAGAGTAGCTT	ATGGACTGGCAGCCAGATG	INPP4A	chr2	2q11.2	99169098	99169125	99169253	99169272	in14-ex15	43	2	0	1	AMPL4388397255	3
AMPL6795081787	CAAGGGACATGGGAGTGGA	GTCGCTATGTGTTCTGGGAAATCA	RPPH1	chr14	14q11.2	20811498	20811517	20811635	20811659	ex1-5'UTR	48.3	1	0	0
AMPL6795090508	CCGCTGCAACCTCCACT	TGGGCCGTTAATGCACTTATATTCC	ZNF703	chr8	8p11.23	37556266	37556283	37556367	37556392	3'UTR	51.2	2	0	0
AMPL6795090874	AGAGGGAAAGAACCTTACTGATTCCA	GTGTCTTTTGTCATCAGTCAGGAATAAG	FOXM1	chr12	12p13	2974503	2974529	2974647	2974675	ex6-in5	54.2	3	0	1	AMPL4295885768	3
AMPL6795090891	CCGCTGCAACCTCCACTA	TTTTTGCATACCATTGACTCATGTGG	ZNF703	chr8	8p11.23	37556266	37556284	37556389	37556415	3'UTR	48.6	3	0	0
AMPL6795093853	ACCATGTGACAGAAAATGAAATTAAGCC	TTAGAACTCATTCCTTGTGTTTAAAGGGAA	SF3B1	chr2	2q33.1	198256597	198256625	198256737	198256767	3'UTR	27.7	2	0	0
AMPL6795093966	TTCCGCATTTTACAAGTCATGTTCAAA	GAACACAGTGATTATATACACTATACTGGAGG	SF3B1	chr2	2q33.1	198256658	198256685	198256798	198256830	3'utr-ex25	25.7	1	0	0
AMPL6795094010	CTTTCCCCCACAGACAGTCAC	AGGCATCTGTTTCCCCATGTTTT	CASP8	chr2	2q33-q34	202151139	202151160	202151246	202151269	in9-ex10	37.2	3	0	0
AMPL6795096696	GCAGAAAGGAGTCCTGTTTGCT	GTCTGTGACACAATCCTGAATTACCT	LAP3	chr4	4p15.32	17586613	17586635	17586757	17586783	ex6-in6	45.9	2	0	0
AMPL6795098239	CGCCCTCTCCAGACACA	CCCTGTGAGCATCGAGCA	GATA3	chr10	10p15	8115836	8115853	8115991	8116009	ex6-3'UTR	65.2	2	0	1	AMPL653346943	1
AMPL6795102801	CCGCAGAGCGTGACAAATTC	AGTCTTTGCAGAAGGCATCTGAAA	ADAMTS16	chr5	5p15	5319028	5319048	5319129	5319153	in22	49.4	2	0	0
AMPL6795109460	CCTGTTCTTTCTCTTTTTAGCTCCCA	CTGAACCTCCCAGGATCCAGTA	ARID1A	chr1	1p35.3	27105494	27105520	27105619	27105641	ex20	47.5	3	0	0
AMPL6795110227	CTGAGTAATGCAGCTCTGCTCAT	AACTCACAAGTTGGACTTAGAGCAA	ADAMTS16	chr5	5p15	5319107	5319130	5319229	5319254	in22-ex23	54.1	2	0	0
AMPL6795110576	GGAGATATGCTATTTGGCTGCCAT	GAAAAGGATGCGGAGTGTGTTG	MKS1	chr17	17q22	56283543	56283567	56283692	56283714	in17-ex17	56.8	2	0	0
AMPL6795111369	CTCGCGCTCACCCTGTT	GGTGGGACTGGGTTGCC	NOTCH1	chr9	9q34.3	139393340	139393357	139393491	139393508	ex33-in32	57.5	2	0	1	AMPL1482283772	3
AMPL6795121632	ACAACTTTACACAACTGTAGTGTTCCTT	GTCAGTGCTTACTCCCCATGAAAT	ZNF217	chr20	20q13.2	52185649	52185677	52185767	52185791	ex5 (3'UTR)	33.3	3	0	1	AMPL4295812948	3
AMPL6795122590	AGGAAAACTGAAGATCTCCCCTGA	AAAGTACCAAAAATAATCATGGCATCAC	MAP2K4	chr17	17p12	11984706	11984730	11984851	11984879	ex3-in3	43.8	3	0	1	AMPL737628902	3
AMPL6795123739	AAGCATTAGTTCTCTTTGTCTCCATTGA	TGGAAAAGACCGTATGACTCACC	ZNF217	chr20	20q13.2	52199617	52199645	52199766	52199789	5'UTR(ex1)	45.5	3	0	1	AMPL4295846570	3
AMPL6795125548	AAATAATAATGCAAAGACCTCCCTTCTCAA	GCATTGATCCCAGCTCTCGTAT	MLL3	chr7	7q36.1	151879983	151880013	151880131	151880153	in35-ex35	31.4	1	0	0
AMPL6795129476	CTGAGAAGTCTGAGCCTGAGAA	CTGCACAGTCATTCCATAAAGAACTG	MLL3	chr7	7q36.1	151879320	151879342	151879457	151879483	ex36	51.3	2	0	0
AMPL6795132064	CAGAAATGAGAAACCACCAATCACA	GATGATCAGTCAGTTTATCCTAAGGCATT	CHEK2	chr22	22q12.1	29115310	29115335	29115418	29115447	ex6-in6	24.1	0	0	0
AMPL6795133227	CGCTTATTTCATTGTTCCCCCATCT	GGCATAGAGGCTGGTACCC	NEUROD2	chr17	17q12	37764060	37764085	37764181	37764200	5'UTR-ex1	72.9	1	0	0
AMPL6795133980	AGCAGCAGAAAAGCACTAAAATGAAAG	ACAAAGTTGAGGATCATGGAGTTGT	NCOR1	chr17	17p11.2	15942714	15942741	15942847	15942872	ex44-in44	54.7	3	0	0
AMPL6795134112	CAAAGGAGAAGTCTGGGCTGA	CTCACCAACAACATTTCAGACAAACA	TBX3	chr12	12q24.21	115118585	115118606	115118690	115118716	in2-ex2	39.3	3	0	0
AMPL6795134711	CAACTAAAAGAAAGGCAGCTGTCAAA	TTGCCTTGCCTTTGTGTTTCAG	CHEK2	chr22	22q12.1	29095779	29095805	29095925	29095947	in9-ex10-in10	47.5	2	0	0
AMPL6795134726	AGGAATTTTACACTGTAACCCGGTTT	ACTCCTGAATGCGCAGAGAG	ESR1	chr6	6q25.1	152415350	152415376	152415503	152415523	in6-ex7	54	2	0	1	AMPL4295235112	2
AMPL6795135638	GAGCGAGTGTGGCATCTCTAC	GCTCTCCCCCAGTGCAGAC	NEUROD2	chr17	17q12	37764155	37764176	37764264	37764283	5'UTR-ex1	60.2	2	0	0
AMPL6795139210	GACCTTATGTTGTCCTATGTGCTACA	GGAGGTTTCCGTCTACCTGTGA	CASP8	chr2	2q33-q34	202139520	202139546	202139670	202139692	in6-ex7	45.2	2	0	0
AMPL6795148974	CTTTCTGTCTGCAAAATTCCAATGGT	GCACAAGATTCCGTGTCACTGT	MLL3	chr7	7q36.1	151833833	151833859	151833949	151833971	3'UTR-ex59	54.4	2	0	0
AMPL6795153803	CCTGCATTTCCCTCTACACTGA	GCAGGGTAGGCTGTTGTGG	PTEN	chr10	10q23.3	89622812	89622834	89622946	89622965	near gene 5'	57.1	2	0	0
AMPL6795154244	TGTCGGAGACCGGAGCTA	CATCAGCGCAGATGCACA	SSTR2	chr17	17q24	71161386	71161404	71161517	71161535	ex1(5'UTR)-in1	54.9	1	0	0
AMPL6795157476	TCTACCAACTCATGGACCACAGT	GGCACTTCAAACCAGTGAACTGA	CASP8	chr2	2q33-q34	202149629	202149652	202149749	202149772	ex9	52.6	3	0	0
AMPL6795163961	TGCCTGCAGGTCAGTTGTAATAAA	GAAAGCAGCCATAAAACACTTCCAAA	MAP2K4	chr17	17p12	12047010	12047034	12047154	12047180	3'UTR	35	2	0	0
AMPL6795164493	GGCTGTCCCTTGGGACT	GGCCATGCGGGAGAATTCA	ERBB2	chr17	17q12	37882708	37882725	37882863	37882882	ex24-in24	61	1	0	1	AMPL403768696	1
AMPL6795167276	CCCCCATCTATGAGCTGACATC	GCTCCTCTGAATCAGTCTCAACA	CASP8	chr2	2q33-q34	202149728	202149750	202149845	202149868	ex9	45.3	3	0	0
AMPL6795167376	AACCAATGATCCTGCCGTGT	CTCCTCCCCACGTTCGAT	ARID1B	chr6	6q25.1	157505335	157505355	157505484	157505502	in11-ex12	45.7	2	0	1	AMPL4007540828	2
AMPL6795168637	AGAGGCTGACATGGGCTTCTA	GGTTCAAGTGACCAACTCAAGGG	CASP8	chr2	2q33-q34	202098691	202098712	202098798	202098821	in1-ex2	64	3	0	0
AMPL6795174076	CGGGAGCCGGAGTCTCT	TGATTTTTGCAACTTGGCTTGGG	LAP3	chr4	4p15.32	17579154	17579171	17579285	17579308	ex1-in1	73.7	0	0	0
AMPL6795174141	GTCTCTCCACCGCAGACAT	CCCGCAAGGAGAGAATTTTTCTTTTAA	LAP3	chr4	4p15.32	17579165	17579184	17579310	17579337	ex1-in1	69	0	0	0
AMPL6795176497	GGACAGCATAGACGACACCTT	TGTGTCTGCAAATCTGCCACT	EGFR	chr7	7p12	55270284	55270305	55270433	55270454	ex27-in27	69	2	0	1	AMPL388972459	2
AMPL6795176770	CCCCAGCTGGCGAACTT	GGTGGAGGAGGGTTGTGG	NEUROD2	chr17	17q12	37762788	37762805	37762932	37762950	in1-ex2	72.4	1	0	0
AMPL6795184207	GGGACTAGAACTGGGATGTCTTG	CCTGCCAATACTGCAGTGAAG	PSMD3	chr17	17q21.1	38154129	38154152	38154233	38154254	ex12(3'UTR	29.6	3	0	0
AMPL6795185081	GTTGGTCTCATTGCTCTTTCAAAGT	GAGCATTTCATTAACCTGAGCTTTGATG	ARID1A	chr1	1p35.3	27056005	27056030	27056101	27056129	in1	36.6	3	0	0
AMPL6795188334	ACAATAAAAAGTTCTCCACAGTGCTTTG	AGACCCATCGCCCTCAGATTA	PSMD3	chr17	17q21.1	38154190	38154218	38154300	38154321	ex12(3'UTR	46.3	3	0	0
AMPL6795189687	GTATAAGGCTGTGCAGGGCTT	CTACCACAGGTAATAAGATGGGACTTT	PSMD3	chr17	17q21.1	38140665	38140686	38140811	38140838	ex2-in2	50.4	2	0	0
AMPL6795191684	GACTCTGAATGTCGGCCAAGAT	CTGGCATACTGGACTCATCTCTC	ERBB2	chr17	17q12	37882826	37882848	37882977	37883000	ex24-in24	63.6	2	0	1	AMPL403794317	1
AMPL6795191879	TGCACATTTTGACTTTCTCATTTGCT	GGGACTGGGACGGCAGATA	ARID1B	chr6	6q25.1	157222465	157222491	157222617	157222636	in2-ex3	59.5	2	0	1	AMPL3015489286	2
AMPL6795192347	CTCCCAGACATGACAGCCAT	GGACATTTTCGCATCCGTCTAC	PTEN	chr10	10q23.3	89624218	89624238	89624363	89624385	ex1-in1	43.2	3	0	1	AMPL703884514	2
AMPL6795193023	GTCTTCTGGGCTGCAGCATAT	TGTGATAGTAGATCGAGAAAGCAAAAGG	ZNF217	chr20	20q13.2	52193768	52193789	52193912	52193940	in2-ex3	30.1	2	0	1	AMPL3586428767	1
AMPL6795200702	CGAGCTCCCTGAAAAAGCAGT	GCTTTCCTGGGCCAGTGA	ARID1B	chr6	6q25.1	157505432	157505453	157505588	157505606	ex12-in12	60	1	0	1	AMPL4007554706	2
AMPL6795201811	GCCGTGGCTGACATGGA	GTGTGGGAAGGGTCGGA	STARD3	chr17	17q11-q12	37793464	37793481	37793581	37793598	ex1(5'UTR)-in1	76	1	0	0
AMPL6795203982	CTCATTGAGAAGGTGCGCAAA	CAGAGATCTTGCCTGGCACA	RARA	chr17	17q21	38508251	38508272	38508403	38508423	ex5-in5	64.9	0	0	0
AMPL6795205559	GGCTGCCTGAATGTCTAGGT	CTGGCTGAGGGTTCTTGGG	MRM1	chr17	17q12	34964602	34964622	34964756	34964775	in4-ex5	52.2	2	0	0
AMPL6795207288	GGGCTGGTATTTGTGCATGGA	GAGGTGGGCTCGGTACAAG	TBX3	chr12	12q24.21	115117424	115117445	115117564	115117583	ex4-in3	54	3	0	1	AMPL4295314569	3
AMPL6795207779	GGGAGGATTTTGAGCACGTGAA	AGAAAAAGAATGAACTCTTCCCTCCAAA	CDH1	chr16	16q22.1	68853266	68853288	68853399	68853427	ex11-in11	53.2	2	0	1	AMPL407548570	3
AMPL6795209463	GGCCAACTCACCTGTGACATT	GCCCAACAATAGGACAGTGCT	FGFR2	chr10	10q26	123324941	123324962	123325067	123325088	ex3	55	3	0	1	AMPL405370004	2
AMPL6795220229	GTTAATAGTGCATCTTCAGTGTCCTGAT	TCTTGCCTTAGGTGAAAAACCATACA	ZNF217	chr20	20q13.2	52193660	52193688	52193804	52193830	in2-ex3	41.4	2	0	1	AMPL3712074682	3
AMPL6795222308	ACTTTAAACAGCCTGTGACCGA	GCTCATCCGCCATGTCCAT	SSTR2	chr17	17q24	71165317	71165339	71165458	71165477	in1-ex2	51.3	1	0	0
AMPL6795228188	GGGTCAGGCCCTTGTGTC	GCCGCCGTGAACAATGT	NOTCH1	chr9	9q34.3	139393252	139393270	139393408	139393425	in33-ex33	61	1	0	1	AMPL1482280061	3
AMPL6795228353	AAACATTGAGAGCCATGCTGGTA	AGGCACTTTTAAGACAAGAGGGTTT	MAP3K1	chr5	5q11.2	56174808	56174831	56174954	56174979	ex11-in11	42.3	2	0	1	AMPL3677940119	3
AMPL6795230952	CATCGCAAGGCTGTCCTCA	CCTCTGACTGGTGGCTGTT	FGFR3	chr4	4p16.3	1806601	1806620	1806750	1806769	ex10-in10	69.2	0	0	1	AMPL4295885909	1
AMPL6795237657	CAACCTAAGTTCGGTTCCGATGAA	CTGTCCTCCCTCACACGTC	CCND1	chr11	11q13	69467754	69467778	69467905	69467924	3'UTR (ex5)	38.6	2	0	1	AMPL492910604	2
AMPL6795239778	CCGCACCTCCCCTGATG	GTTTGCGGATGATCTGTTTGTTCT	CCND1	chr11	11q13	69458561	69458578	69458702	69458726	in2-ex3	56.5	1	0	1	AMPL467730576	3
AMPL6795241483	CAATTCTGCAGGTAAGTGCTAGTCA	GTTGTTCATTTTGGTGGCTGGAG	ARID1A	chr1	1p35.3	27092847	27092872	27092995	27093018	in9-ex10	43.1	1	0	0
AMPL6795242548	GCTGTATGCCTGGCATCCAAT	GCCAGTAGGACTGTAGACAGTGAAA	FGFR2	chr10	10q26	123324840	123324861	123324978	123325003	in3-ex3	44.4	3	0	1	AMPL4295910025	3
AMPL6795245700	CTTCTTCGGCAGAAAAGGACTTTC	GGCTCCCCCGGACTTTA	IGFBP4	chr17	17q12-q21.1	38599517	38599541	38599674	38599691	ex1 (5'UTR)	76.1	0	0	0
AMPL6795250016	GGCTCCCTCACCCCTTTC	GCCTCAAACCCAAACCAGCTAT	FOXM1	chr12	12p13	2983108	2983126	2983257	2983279	in2-ex2	54.2	2	0	1	AMPL4295891819	3
AMPL6795252608	GTAGTCTGTCTTCTAACACTCCTCCT	GCTTCCTGTGCTTCATCCAAAC	TAOK1	chr17	17q11.2	27861035	27861061	27861139	27861161	in18-ex19	35.9	3	0	0
AMPL6795252705	CGACCCCCAGCAGTTGTG	ACGTCCGTGCCTGTTTCT	MRM1	chr17	17q12	34958662	34958680	34958773	34958791	ex1-in1	60.2	1	0	0
AMPL6795255393	CTCCTCCTCCTCACTCCTCA	CCCCCTCTATATCCCCCTTTCC	TAOK1	chr17	17q11.2	27717946	27717966	27718062	27718084	ex1(5'UTR)-in1	69.8	2	0	0
AMPL6795256949	GAAAGGGTAAGGGCACCTCTG	CACAGAATCACAGACCCTCCTTTT	TAOK1	chr17	17q11.2	27718037	27718058	27718153	27718177	ex1(5'UTR)-in1	63.2	1	0	0
AMPL6795258668	GGAGTGGATAAGGTCATCACCA	GGTAAGTCTGGCTAAGGGATCAC	MRM1	chr17	17q12	34958747	34958769	34958855	34958878	ex1-in1	59.3	3	0	0
AMPL6795261812	GACTAAAGGTGTGTGTGTGGCT	AGACATTTTACATCATCATCTGCTGCTT	NF1	chr17	17q11.2	29557793	29557815	29557909	29557937	in23-ex24	38.3	3	0	1	AMPL2889442169	3
AMPL6795277223	GCCCCTCTCTCTCCATAGTGA	GCTGAAGCTAAATGCCATGGG	PIK3CA	chr3	3q26.3	115118748	115118769	115118853	115118874	off target	48.8	3	0	0
AMPL6795279620	TCCTGCTAAGGAACCCAGTGA	GTCAAGACGCAGATCAGAAATACAGTAT	PIK3CA	chr3	3q26.3	115118832	115118853	115118951	115118979	off target	44.9	2	0	0
AMPL6795285313	TTTGGGAAGCCAGACTGAATAAGAA	GTTGACCTTTCAGCCATTCAGTG	MAP3K1	chr5	5q11.2	56179255	56179280	56179406	56179429	in14-ex15	34.1	2	0	1	AMPL4310991361	3
AMPL690358349	CCTGCGTTTGTGCCCAGATTA	CAGGATGGTGAGGAGAAGCTG	MRM1	chr17	17q12	34964252	34964273	34964378	34964399	ex3-in3	63.8	2	0	0
AMPL703854036	TGACAGTTTGACAGTTAAAGGCATT	CAGGTAACGGCTGAGGGAAC	PTEN	chr10	10q23.3	89717547	89717572	89717700	89717720	in6-ex7	42.2	3	0	1	AMPL704007908	2
AMPL706844244	CGCTTCTTGTCCTGCTTGCTTA	TCCTATCCTGAGTAGTGGTAATCTACTG	TP53	chr17	17p13.1	7576996	7577018	7577142	7577170	ex8-in8	61.6	1	1	1	AMPL706844244	2
AMPL734573521	TGAAAACACCGCAGCATGTC	GTGTTAAACAATACAGCTAGTGGGAA	EGFR	chr7	7p12	55259476	55259496	55259624	55259650	ex21-in21	53.1	1	0	0
AMPL735887326	TCTAATTTTGTGACATTTGAGCAAAGAC	GAGCCAAGCATCATTGAGAAAAGATT	PIK3CA	chr3	3q26.3	178951797	178951825	178951942	178951968	in20-ex21	37.3	1	1	1	AMPL735887326	1
AMPL737593644	GGAGTAGTAAATGATGCCTGGTGT	GAATTACTCAGCTGCGGAGGAT	MAP2K4	chr17	17p12	12032402	12032426	12032534	12032556	in8-ex9	39.4	3	1	1	AMPL737593644	2
AMPL737619629	GCTTCCCAATATTTTAACAGAGAGAGACT	CGTCCAATTTCTCCAAGGTCTTTCAA	MAP2K4	chr17	17p12	11984653	11984682	11984757	11984783	ex3	47.4	3	1	1	AMPL737619629	3
AMPL753315302	AAGCAAGAATAAGATTGCTCCTTTCTA	CAAACGAGGTAGACATGAGTTCCATAC	MAP2K4	chr17	17p12	12011005	12011032	12011122	12011149	in4-ex5	27.5	0	1	1	AMPL753315302	0
AMPL754018084	TGAGAAAGTTAAAATTCCCGTCGCTAT	GCAGGGTCTAGAGCAGAGCAG	EGFR	chr7	7p12	55242435	55242462	55242585	55242606	ex19-in19	49.6	3	0	0
AMPL766304699	TGATTCTGAATTAGCTGTATCGTCAAGG	AGTGTATTAACCTTATGTGTGACATGTT	KRAS	chr12	12p12.1	25398239	25398267	25398365	25398393	ex2-in1	35.7	2	0	0
AMPL803120884	TCTCAGAATCATCGGACTCAGG	ACTTAACATAACCAGTAAGCTAACTTGTTGT	MDM2	chr12	12q14.3-q15	69218137	69218159	69218270	69218301	ex6-in6	33	2	1	1	AMPL803120884	2
AMPL835440922	TGAATTGAACTGCGTCTGCCT	GCTCAGTGCCATGTTCGACTT	THRA	chr17	17q11.2	38250112	38250133	38250241	38250262	ex10 (3'UTR)	65.7	1	0	0
AMPL841477737	TGGTCATCCAAACTCAAACTTGAGAAA	CTTCTGCTTTTGTGGTAAGTTTAAAAGG	BRCA2	chr13	13q12.3	32973755	32973782	32973855	32973883	ex27- 3'UTR	43.8	3	0	1	AMPL3662034928	2
AMPL890385669	ACTGCTTCTTGGAGCTTTGGAATATTT	CAAATTACAAAGTCATCATCACATCCTAGA	MAP2K4	chr17	17p12	12046900	12046927	12047033	12047063	3'UTR	32.1	1	0	0
AMPL899211780	CAAGAGGTGACAGCAGAGGATG	ACTAGGTCCCAAGAGGGTCTGA	ERBB2	chr17	17q12	37868237	37868259	37868387	37868409	ex8-in8	64.8	2	0	0
AMPL948929446	GGAATAAGATGGTAGAATACCTGACAGACT	CACAGTAAAACCCACTAATACTTGAAGGT	NF1	chr17	17q11.2	29557859	29557889	29557957	29557986	ex24-in24	36.2	3	1	1	AMPL948929446	3

## Sheet: Table B_Bpanel_genes
	Gene amplicon read ratios, B panel, BLOOD										Gene amplicon read ratios, B panel, TUMOR
Gene Symbol	N observations	Mean	Std	Min	Q1	Median	Q3	Max		Gene Symbol	N observations	Mean	Std	Min	Q1	Median	Q3	Max
ADAMTS16	642	0.2	0.1	0	0.1	0.1	0.2	0.9		ADAMTS16	642	0.2	0.1	0	0	0.1	0.2	0.7
AKT1	214	0.4	0.2	0	0.3	0.4	0.5	1.1		AKT1	214	0.1	0.1	0	0.1	0.1	0.2	0.4
APOBEC3B	428	0.4	0.2	0	0.3	0.4	0.5	1.3		APOBEC3B	428	0.3	0.2	0	0.1	0.2	0.3	1.8
ARID1A	642	0.2	0.2	0	0.1	0.2	0.4	1.5		ARID1A	642	0.2	0.2	0	0.1	0.2	0.4	0.9
ARID1B	963	0.4	0.2	0	0.2	0.3	0.4	1.5		ARID1B	963	0.2	0.1	0	0.1	0.2	0.2	1.1
BRCA1	642	0.3	0.2	0	0.1	0.2	0.4	1.4		BRCA1	642	0.4	0.2	0	0.2	0.3	0.5	1.4
BRCA2	1284	0.1	0.1	0	0	0.1	0.2	0.9		BRCA2	1.284	0.2	0.3	0	0	0.1	0.3	2.1
CASP8	856	0.4	0.2	0	0.3	0.4	0.5	2.6		CASP8	856	0.4	0.2	0	0.3	0.4	0.5	1.4
CCND1	535	0.3	0.2	0	0.2	0.3	0.4	1.8		CCND1	535	0.5	0.6	0	0.1	0.3	0.6	4.9
CDH1	1177	0.4	0.2	0	0.2	0.4	0.5	1.6		CDH1	1.177	0.2	0.2	0	0.1	0.2	0.3	1.1
CDKN2A	749	0.3	0.2	0	0.1	0.2	0.4	1		CDKN2A	749	0.1	0.1	0	0	0.1	0.1	0.7
CHEK2	856	0.2	0.2	0	0.1	0.2	0.3	1.8		CHEK2	856	0.2	0.2	0	0.1	0.2	0.3	1.1
E2F3	321	0.3	0.3	0	0.1	0.3	0.5	1.9		E2F3	321	0.3	0.2	0	0.1	0.2	0.4	1.4
EGFR	1284	0.4	0.2	0	0.3	0.4	0.5	1.5		EGFR	1.284	0.4	1.2	0	0.1	0.2	0.3	34.2
EMSY	428	0.3	0.2	0	0.1	0.2	0.3	1.4		EMSY	428	0.2	0.1	0	0.1	0.2	0.3	0.8
ERBB2	107	0.3	0.2	0	0.1	0.3	0.5	1.4		ERBB2	1.07	0.4	0.8	0	0	0.1	0.4	10.5
ESR1	428	0.3	0.2	0	0.1	0.2	0.4	1		ESR1	428	0.1	0.1	0	0	0.1	0.2	0.8
FGFR1	535	0.3	0.2	0	0.2	0.3	0.5	2.1		FGFR1	535	0.1	0.1	0	0.1	0.1	0.2	1.3
FGFR2	428	0.4	0.2	0	0.3	0.4	0.4	1.5		FGFR2	428	0.3	0.2	0	0.2	0.3	0.4	1.5
FGFR3	321	0.1	0.1	0	0.1	0.1	0.2	0.4		FGFR3	321	0	0	0	0	0	0	0.2
FOXM1	642	0.5	0.2	0	0.3	0.4	0.6	1.9		FOXM1	642	0.3	0.2	0	0.2	0.3	0.4	1.4
GATA3	428	0.4	0.2	0	0.4	0.4	0.5	1.2		GATA3	428	0.3	0.2	0	0.2	0.3	0.4	1.2
IGFBP4	214	0.2	0.3	0	0	0.1	0.5	0.9		IGFBP4	214	0.1	0.1	0	0	0	0.2	0.7
INPP4A	642	0.3	0.2	0	0.1	0.2	0.4	1.3		INPP4A	642	0.2	0.1	0	0.1	0.1	0.2	0.8
LAP3	428	0.3	0.1	0	0.2	0.2	0.3	1.5		LAP3	428	0.1	0.1	0	0	0.1	0.2	0.6
MAP2K4	107	0.2	0.2	0	0	0.2	0.4	1.2		MAP2K4	1.07	0.2	0.2	0	0	0.2	0.4	1.1
MAP3K1	963	0.2	0.1	0	0.1	0.2	0.3	1.1		MAP3K1	963	0.2	0.2	0	0.1	0.2	0.3	1.1
MDM2	749	0.2	0.2	0	0.1	0.1	0.3	1		MDM2	749	0.2	0.2	0	0	0.2	0.4	1.8
MET	321	0.5	0.3	0	0.3	0.4	0.6	3		MET	321	0.4	0.2	0	0.2	0.3	0.5	2.1
MKS1	428	0.4	0.2	0	0.2	0.4	0.5	1.7		MKS1	428	0.3	0.3	0	0.1	0.2	0.4	2.2
MLL3 (KMT2C)	1819	0.1	0.1	0	0	0.1	0.1	0.7		MLL3 (KMT2C)	1.819	0.2	0.2	0	0	0.1	0.2	1.2
MRM1	535	0.4	0.2	0	0.2	0.4	0.5	1.3		MRM1	535	0.2	0.1	0	0.1	0.2	0.3	0.9
MYC	321	0.3	0.2	0	0.1	0.3	0.5	1.2		MYC	321	0.3	0.2	0	0.1	0.3	0.4	1.1
NCOR1	856	0.3	0.2	0	0.1	0.3	0.4	1.5		NCOR1	856	0.3	0.2	0	0.1	0.2	0.4	1.8
NEUROD2	321	0.2	0.1	0	0.1	0.2	0.2	0.9		NEUROD2	321	0.2	0.3	0	0	0.1	0.2	2.5
NF1	107	0.2	0.1	0	0.1	0.2	0.3	1.5		NF1	1.07	0.3	0.3	0	0.1	0.3	0.5	3.6
NOTCH1	535	0.3	0.2	0	0.1	0.3	0.5	1.4		NOTCH1	535	0.1	0.1	0	0	0.1	0.1	0.6
NOTCH4	535	0.3	0.2	0	0.2	0.3	0.4	1.6		NOTCH4	535	0.1	0.1	0	0.1	0.1	0.2	0.5
PALB2	642	0.2	0.2	0	0	0.1	0.3	0.7		PALB2	642	0.3	0.2	0	0.1	0.3	0.4	1.3
PIK3CA	1605	0.2	0.2	0	0	0.1	0.3	1.4		PIK3CA	1.605	0.3	0.4	0	0	0.2	0.5	3.3
PIK3R1	107	0.2	0.1	0	0.2	0.2	0.3	0.6		PIK3R1	107	0.6	0.2	0.1	0.4	0.5	0.7	1.5
PSMD3	321	0.3	0.2	0	0.2	0.3	0.4	0.9		PSMD3	321	0.7	0.9	0	0.2	0.5	0.8	6.6
PTEN	107	0.3	0.2	0	0.1	0.3	0.5	1.5		PTEN	1.07	0.3	0.3	0	0.1	0.2	0.4	1.8
RAD51C	428	0.2	0.1	0	0	0.2	0.3	0.7		RAD51C	428	0.3	0.3	0	0	0.3	0.4	1.7
RARA	535	0.3	0.3	0	0	0.3	0.5	1.6		RARA	535	0.1	0.2	0	0	0.1	0.2	1.3
RB1	856	0.2	0.2	0	0	0.1	0.3	1.2		RB1	856	0.3	0.3	0	0	0.2	0.5	1.7
RPPH1 (Rnase P)	428	0.1	0.1	0	0	0.1	0.1	0.4		RPPH1 (Rnase P)	428	0.1	0.1	0	0	0.1	0.1	0.4
SF3B1	535	0.1	0.1	0	0	0.1	0.2	0.5		SF3B1	535	0.2	0.1	0	0.1	0.1	0.3	0.8
SSTR2	321	0.1	0.1	0	0	0.1	0.2	0.5		SSTR2	321	0.1	0.1	0	0	0	0.1	0.5
STARD3	321	0.1	0.1	0	0.1	0.1	0.2	0.7		STARD3	321	0.1	0.1	0	0	0	0.1	1.5
TAOK1	642	0.3	0.2	0	0.1	0.3	0.4	1.4		TAOK1	642	0.5	0.6	0	0.2	0.3	0.6	5.8
TBX3	749	0.4	0.3	0	0.3	0.4	0.6	1.6		TBX3	749	0.6	0.5	0	0.3	0.4	0.6	2.8
TERT	856	0.4	0.2	0	0.2	0.3	0.5	2		TERT	856	0.2	0.2	0	0.1	0.2	0.3	1.7
THRA	107	0.3	0.1	0	0.2	0.3	0.3	0.6		THRA	107	0.2	0.3	0	0.1	0.2	0.2	2
TOP2A	321	0.2	0.1	0	0.1	0.2	0.3	0.7		TOP2A	321	0.4	0.2	0	0.2	0.3	0.5	1.6
TP53	1498	0.3	0.2	0	0.1	0.3	0.5	1.9		TP53	1.498	0.1	0.1	0	0.1	0.1	0.2	0.7
TSN	428	0.4	0.2	0	0.3	0.4	0.5	1.8		TSN	428	0.4	0.2	0	0.3	0.4	0.5	1.4
VEGFA	428	0.3	0.2	0	0.2	0.3	0.5	1.2		VEGFA	428	0.3	0.2	0	0.1	0.2	0.3	1
ZNF217	535	0.3	0.2	0	0.2	0.3	0.4	1.2		ZNF217	535	0.5	0.3	0	0.3	0.4	0.6	2.6
ZNF703	535	0.2	0.2	0	0.1	0.2	0.3	0.8		ZNF703	535	0.2	0.3	0	0	0.1	0.2	2.3
										Note1: colored cells reflect outliers for max gene read ratios
										Note 2: N = number of amplicons per gene X number of samples (all observations for the same gene in the same sample series)

## Sheet: Table C_T Panel
T PANEL; IAD39350_30	Ion_AmpliSeq_Fwd_Primer	Ion_AmpliSeq_Rev_Primer	Gene_Symbol	Chr	Chr__Band	Amplicon_Start	Insert_Start	Insert_Stop	Amplicon_Stop	Location__intron_exon	amplicon_GC	ampEVAL_cat10%_TUMOR	common_amplicons_with_B_panel	common_targets_with_B_panel (shifted amplicons)	common_target_AMP_ID_B_Panel	corresponding B panel AMP evaluation_TUMOR
AMPL1073217766	AGTTTAAGATGAGTCATATTTGTGGGTT	CTGGTGTTACAGAAGTTGAACTGCTA	PTEN	chr10	10q23.3	89724991	89725019	89725093	89725119	in8-ex9	38.7	3	1	1	AMPL1073217766	3
AMPL1074892261	CTGTCCAATTTCCTAATCTCTGTGATT	ACCAAGAAATGGATCTGTGGGTTATG	CDH1	chr16	16q22.1	68835534	68835561	68835682	68835708	in2-ex3	48.4	2	1	1	AMPL1074892261	1
AMPL1076947608	TTTTGTTTTTAACTTCATTGTTTCTGCTCT	TTCATTCACATCCAGCACATCCA	CDH1	chr16	16q22.1	68849384	68849414	68849520	68849543	in9-ex10	53.3	2	1	1	AMPL1076947608	1
AMPL1080601983	AAGAAATCGATAGCATTTGCAGTATAGA	TGGAGAAAAGTATCGGTTGGCTTT	PTEN	chr10	10q23.3	89720742	89720770	89720842	89720866	ex8	31.5	1	0	0
AMPL1113806468	AAACATCAAACTACTCACCGCTGA	CTCATGGAGGCATGGGAGAAAA	NCOR1	chr17	17p11.2	16049672	16049696	16049810	16049832	ex10	34.8	1	0	1	AMPL1113813538	3
AMPL1113813538	ATCAAACTACTCACCGCTGAAATCT	TGCCAGCGTTATGATCAGCTC	NCOR1	chr17	17p11.2	16049676	16049701	16049829	16049850	ex10	37.2	1	1	1	AMPL1113813538	3
AMPL1113909491	TGACTACTGCTGTGCCAATTTTGTAT	TCACATCTTAATTAACTTGAATGTTTGCTTAAA	NCOR1	chr17	17p11.2	15943702	15943728	15943813	15943846	in43-ex43-in42	40.7	2	1	1	AMPL1113909491	1
AMPL1114144167	ACAAAAGTTTAACATTTCTGCCAACCA	TGGATTGTTTCATGTTTCTCTGCCT	NCOR1	chr17	17p11.2	15983684	15983711	15983831	15983856	in25-ex25-in24	47.9	2	1	1	AMPL1114144167	3
AMPL1206820909	GACCTAAGAGCAATCAGTGAGGAA	CATCTACAAGCAGTCACAGCAC	TP53	chr17	17p13.1	7578287	7578311	7578425	7578447	in5-ex5	65.2	2	0	1	AMPL1992796664	1
AMPL1224430587	CATATTTAGGCCAGTTCCAGTGACA	GACACCTACATTGGTTCTGTGGAAT	TOP2A	chr17	17q21-q22	38572857	38572882	38573002	38573027	in2-ex2	39.7	2	1	1	AMPL1224430587	3
AMPL1224444224	GAGCTTGATTTTACCTGGGTCACTA	GCTAGCCTGTAAATGAAAATATGCAAGT	TOP2A	chr17	17q21-q22	38572978	38573003	38573124	38573152	ex2	34.4	1	0	0
AMPL1234995130	GATCGAAGATTGTTTATGCATCATGTTTCT	GGGAAGTGTTAACTTCTTAACGTTAGTG	BRCA2	chr13	13q12.3	32920975	32921005	32921118	32921146	ex13-in13	28.1	0	1	1	AMPL1234995130	1
AMPL1250893558	GCCTTTCTCTTCTTCCTTGACTTTAGA	GGCAGACATGTTGATTATGTAGCTGA	TOP2A	chr17	17q21-q22	38567553	38567580	38567678	38567704	in9-ex9	38.4	3	1	1	AMPL1250893558	2
AMPL1251014075	TGGCATGTTGATCCAAAGCTCTT	CAACTTCTATTGCAGGTGAAAAATCACA	TOP2A	chr17	17q21-q22	38567386	38567409	38567485	38567513	ex10	35.1	3	0	0
AMPL1263382818	GTCCCAAAGTGCAGCTTGTCTA	CATATTTTTGTCAGGGAGCTCAGGA	CDH1	chr16	16q22.1	68845538	68845560	68845677	68845702	in6-ex7	52.5	3	0	1	AMPL5763611983	3
AMPL1481297863	ACTTTGTGGAGACAGGTTCCTTG	ACTCAGTCATAACAGCTCAAAGTTGAA	BRCA1	chr17	17q21	41267762	41267785	41267878	41267905	ex3-in2	33	2	1	1	AMPL1481297863	2
AMPL1481313993	CCATTTTCCTCCCGCAATTCCT	GCTCTTTAGCTTCTTAGGACAGCA	BRCA1	chr17	17q21	41215907	41215929	41216021	41216045	ex17-in16	35.5	3	0	1	AMPL5315655094	3
AMPL1482059466	ACAGCCCAGCCTTTCGTT	CTGGAGCTTGAGGACAGGAG	NOTCH1	chr9	9q34.3	139404499	139404517	139404626	139404646	in17	67.3	1	0	0
AMPL1482263087	CAGGCCTCCGTGCCATT	CCTTCGGTGGTGGTGGTG	NOTCH1	chr9	9q34.3	139438479	139438496	139438592	139438610	ex2-in1	67	2	1	1	AMPL1482263087	1
AMPL1482280061	GGTTTGGCCCTCACTTCTCTG	CAATGTGGATGCCGCAGTTG	NOTCH1	chr9	9q34.3	139393283	139393304	139393394	139393414	in33-ex33	57.1	3	0	1	AMPL6795228188	1
AMPL1482283772	CATATCTTTGTTAGCCCCGTTCTTCA	CCAGCTGGTCTCCAACCTAC	NOTCH1	chr9	9q34.3	139393363	139393389	139393470	139393490	ex33-in32	63.4	3	0	1	AMPL6795111369	2
AMPL1482541142	AGGCCTCTTAAAGATCATGTTTGTTACA	GAAGTACAGCTTCACCTAGAGAAAGAAA	PTEN	chr10	10q23.3	89724893	89724921	89725030	89725058	in8	21.8	0	0	0
AMPL1487650614	CACGGGTCGGGTGAGAG	CCTGGCTCTGACCATTCTGTT	CDKN2A	chr9	9p21	21971112	21971129	21971218	21971239	ex2-in1	71.1	2	0	1	AMPL391623459	0
AMPL1490110093	CCCAAAACAGAAACCGTATTGAGT	GCCAAAGGACCACTAGTAAAACAAGAA	MET	chr7	7q31	116435587	116435611	116435693	116435720	in19	38.6	2	0	0
AMPL1495431382	TGTTTGGCGTTTCCCAGAGT	CCAAGATGTGCAAATTGTCTATTTTGTC	CCND1	chr11	11q13	69467691	69467711	69467813	69467841	ex5	43.7	3	0	1	AMPL6795016229	3
AMPL1496009646	GCCATTTGTTTTGACACAGGATTTCTTA	AAATATTGATTGTTTCTAATAGAGCAGCCA	PIK3CA	chr3	3q26.3	178948084	178948112	178948202	178948232	ex20-in20	36.3	3	1	1	AMPL1496009646	3
AMPL1496645572	GAGCATCTATGGGAAGAAGAAGGG	CCCACCAAGAGATCATCACTAAGG	FGFR1	chr8	8p11.23-p11.22	38285948	38285972	38286072	38286096	in3	58.4	2	0	0
AMPL1497150955	AGCCTTGCCCCATCAACTG	AACAAGATATGACAAAGGGAGAGTTGG	ERBB2	chr17	17q12	37873706	37873725	37873812	37873839	ex15-in15	50	3	0	1	AMPL4136609628	3
AMPL1497223320	GAAATAGGGCGATGAATTGATGCTAAT	ACTTACAGCTAAGGAAATTTCAGGATCTTC	MDM2	chr12	12q14.3-q15	69230409	69230436	69230505	69230535	in9-ex10	35.7	1	0	0
AMPL1500218300	CTGTTGGTGCACAAAAAGACACTTAT	CGACCACAAAATTAAATGTTGCTGCTTA	MDM2	chr12	12q14.3-q15	69207371	69207397	69207513	69207541	ex3-in3	34.2	1	0	1	AMPL6794968448	3
AMPL1509836316	ATGGGTGGATGGCCTAATTCC	GGAGAGTCCTCACGAAACTGA	VEGFA	chr6	6p12	43742176	43742197	43742285	43742306	in2	50.6	3	0	0
AMPL1511195964	CCCATTGCAGACCAAAGAAAGATAGA	CACAAGACCAAGTCCCTGACC	VEGFA	chr6	6p12	43746616	43746642	43746754	43746775	ex5-in5	55.8	2	0	1	AMPL6794985818	2
AMPL1516620128	TGGAAACTTTCCACTTGATAAGAGG	TGCAGTTATGCCTCAGATTCACTTTTAT	TP53	chr17	17p13.1	7576812	7576837	7576950	7576978	in9-ex9-in8	50	1	1	1	AMPL1516620128	1
AMPL1527540537	GGGACATGGCCAAGAGAAGTA	GATAACAACACGCCTCTCTTCAAC	FGFR2	chr10	10q26	123263278	123263299	123263381	123263405	in10-ex10	54.2	3	0	0
AMPL1560825852	TTTGTCTCTAGTGCAGTTTTTCGAGAT	CAAGGATTCAATGGAGAAGGAGAAAC	VEGFA	chr6	6p12	43754095	43754122	43754234	43754260	3UTR	23.9	0	0	1	AMPL6794985525	1
AMPL1729922763	GAGCAATGTATGTCTATCCTCCAAATGT	AAAGATATAGACACAGGTAGAAGACTGC	PIK3CA	chr3	3q26.3	178917610	178917638	178917726	178917754	ex3-in3	27	0	0	0
AMPL1740838243	CGACGGGAAGACAAGTTCATGTA	TCTGTCCTTATTTTGGATATTTCTCCCAATG	PTEN	chr10	10q23.3	89717672	89717695	89717792	89717823	ex7-in7	38.8	2	0	1	AMPL651219895	3
AMPL1745719238	ATGTATTTGCTTTTTCTGTAAATCATCTGTGAA	GAGCTGTTCTTTGTCATTTTCCCTTAAT	PIK3CA	chr3	3q26.3	178935908	178935941	178936023	178936051	in9-ex10	30.1	0	0	1	AMPL3669331689	0
AMPL1835732514	ATATATGCCATCAGAAGGATGTGTTACA	CTTTTGAATATAACCTCCCTGGGAACAA	RB1	chr13	13q14.2	48916578	48916606	48916724	48916752	in2	20.2	0	0	0
AMPL1854694292	TCACTTTTGGGTAAATACATTCTTCATACCA	TTCCTTGTCATTATCTGCACGCT	PTEN	chr10	10q23.3	89720662	89720693	89720768	89720791	ex8	38.2	2	0	0
AMPL1893997738	GAATTTAATTCTGATCTCAAAGCTCCTCTTG	CCCATATCCTACACATTAGACGTACCTT	VEGFA	chr6	6p12	43754204	43754235	43754328	43754356	off target	53.2	3	0	0
AMPL2079868394	TGTTATTTTATAGGGTGACTGTTGGATCTG	AGACCAGGTACTTACTGCTAAAGTGATT	MAP2K4	chr17	17p12	12011094	12011124	12011213	12011241	ex5	28.9	0	1	1	AMPL2079868394	1
AMPL2478392773	ATGCTATCACACACATTCACTTGAGT	ATTACCTGGTGCAGGCTGT	PIK3R1	chr5	5q13.1	67576665	67576691	67576820	67576839	in6-ex7	28.5	0	0	0
AMPL2521154115	AGGTTTCCAAATTAGAAGAGTTGCTGAA	GGTGGGCCTGGGAAGAC	NCOR1	chr17	17p11.2	15937977	15938005	15938094	15938111	in45-ex45	34.4	1	0	0
AMPL2523998218	CAAGTGGGCAAATAATGGCAGTTAA	ATTTACCACAAAAGTAGGAACACAACAAC	MAP2K4	chr17	17p12	11984822	11984847	11984918	11984947	ex3-in3	34.7	3	0	0
AMPL2597623118	AGTCAAAAGGCCTCTACGGTTT	CGAACTTCTCAGAAAAATGCCAACATA	CDH1	chr16	16q22.1	68835661	68835683	68835797	68835824	ex3-in3	56.5	2	0	1	AMPL3430096723	1
AMPL2646901541	CAGACTGTACTTACTGCAGCAGATA	CTACTAATAAAGTATAAAATGGTGACGAATCCT	MAP3K1	chr5	5q11.2	56160668	56160693	56160763	56160796	ex4-in4	50.7	3	1	1	AMPL2646901541	3
AMPL2685800356	AGGAATGCCTTCAAAAAGTTGGGA	CTCCAGTGCATCCATGAACTCT	FGFR1	chr8	8p11.23-p11.22	38275706	38275730	38275858	38275880	in10-ex10	58.1	2	1	1	AMPL2685800356	2
AMPL2705185935	TGCAGTCTTCTACCTGTGTCTATATCTT	CAGTATCATATTCACACAAAAATTCAACCA	PIK3CA	chr3	3q26.3	178917726	178917754	178917870	178917900	in3	29.9	1	1	1	AMPL2705185935	2
AMPL2820468261	TCTTAATGATCGGCCTTTCTGGTG	CTCTCTCTTCTCTGTAGCCATTACATTT	FGFR2	chr10	10q26	123324780	123324804	123324899	123324927	in3	39.6	3	0	0
AMPL2820991798	TGCGAGCAGAAAGTGGAATGAA	CCTCGGGACAGGTAATAATACTTTGAC	FGFR1	chr8	8p11.23-p11.22	38275604	38275626	38275729	38275756	in10	45.2	3	0	1	AMPL6795029525	0
AMPL2841717195	CGCCTCCTCGGAGTCCTT	GGCGTCACTCACACCCG	FGFR3	chr4	4p16.3	1795718	1795736	1795860	1795877	ex2-in2	76.8	1	1	1	AMPL2841717195	0
AMPL2889442169	GGTGTGTGTGTGGCTTCAAAAAC	TCATCATCTGCTGCTTGGTTTGAT	NF1	chr17	17q11.2	29557800	29557823	29557901	29557925	in23-ex24	66.4	3	0	1	AMPL6795261812	3
AMPL2891242109	GAGGTGGGAGCGGAGTG	CTTGGCCACCCCCACTTAT	NF1	chr17	17q11.2	29422410	29422427	29422531	29422550	in1	68.6	1	0	0
AMPL3015471280	GAAAGCAGCGTGTCGATTTGT	ACTGAGGTGGCATCTGTCAAAAA	ARID1B	chr6	6q25.1	157222349	157222370	157222499	157222522	in2	33.8	1	1	1	AMPL3015471280	3
AMPL3015489286	TGACTTTCTCATTTGCTTTGCTTGAC	GGACTGGGACGGCAGATACT	ARID1B	chr6	6q25.1	157222474	157222500	157222615	157222635	in2-ex3	60.3	2	0	1	AMPL6795191879	2
AMPL3298927400	CTGCGTGAAAGAAGCAGATGG	CGACGTCAACGCCGTAGAT	NOTCH1	chr9	9q34.3	139393449	139393470	139393570	139393589	in32-ex32	71.3	2	0	1	AMPL6795045385	1
AMPL3317685123	CAGGAGAAGAGAGGTCAGTCTCA	GCAACCCATGATACTGAGCAGAG	NOTCH1	chr9	9q34.3	139438566	139438589	139438680	139438703	in1	73.9	2	0	1	AMPL6795052845	2
AMPL3333251692	ATCTGCATCATAAAGTCGTCTCATTGT	CAATCGCTATGTCCTGAGTTGGT	E2F3	chr6	6p22	20490258	20490285	20490409	20490432	in6-ex7	29.6	1	1	1	AMPL3333251692	3
AMPL3430006462	GATGCCAACCTCCTCAACGA	GGCGACGATCTTCCGCAT	CCND1	chr11	11q13	69456136	69456156	69456246	69456264	ex1	65.9	3	0	0
AMPL3431752919	AGTAATTTGCATTTGTGCCCATCTG	GGCTGTGGCATTTCTCATTTTGTAA	RAD51C	chr17	17q22	56774262	56774287	56774364	56774389	in3	38.5	3	0	0
AMPL3431998419	AAGTATTACAAATAGCACAAAAAGTATATTGCA	TTGGCATGTTATTGTTTCCCATTCTTTC	PALB2	chr16	16p12.2	23614310	23614343	23614451	23614479	3UTR	28.4	0	0	0
AMPL3474023145	GCTGAGGTCCAAGTATTCCTGAAAG	CCACATCTCAAGAGTTTGTGTTTGAAAT	FGFR2	chr10	10q26	123239518	123239543	123239653	123239681	in17-in17	43.2	2	0	1	AMPL6795003971	3
AMPL3492596718	CCAGTGTGATCTCTGAAATTAAATTACTTCA	GAATCAGTGCCAATTTGAAAGCAAGATA	BRCA2	chr13	13q12.3	32973659	32973690	32973782	32973810	3UTR	21.5	0	1	1	AMPL3492596718	0
AMPL3493168149	CACTGCTTACCTTCCCGACTT	GCATCTGAGGCCTTTGAAGAC	TBX3	chr12	12q24.21	115120607	115120628	115120730	115120751	ex1	56.3	3	0	1	AMPL6795030104	3
AMPL3501685042	CCTAGAACCCCTCCCAGCTT	TGACCCCGTCATCTGAGGAG	TERT (rs10069690)	chr5	5p15.33	1279706	1279726	1279815	1279835	in4	58.9	2	1	1	AMPL3501685042	3
AMPL3503453465	TGTCCACCTCACCCCACA	CGTGCGCTTCCGCTTAC	TERT (rs10069690)	chr5	5p15.33	1279796	1279814	1279943	1279960	in4	72.3	0	1	1	AMPL3503453465	0
AMPL3503455488	GGCTCCTGGCAGTCGTG	AGGCTCTGAGGACCACAAGAA	TERT (rs2242652)	chr5	5p15.33	1279909	1279926	1280033	1280054	in4	74.1	1	0	0
AMPL3503455543	GACACGGATCCAGGACCTC	GCCGGTGCCTCCAGAAAA	TERT (rs2242652)	chr5	5p15.33	1279981	1280000	1280093	1280111	in4	71.3	2	1	1	AMPL3503455543	3
AMPL3503464798	CAGGAGCTCCCCCTACAC	TGCGTTTGAGCCCCACATT	TERT (rs2242652)	chr5	5p15.33	1280065	1280083	1280214	1280233	in4	65.9	1	1	1	AMPL3503464798	1
AMPL3503512697	GCTCGGAGCCTCATCCT	CTCCGCGGTGTCGAGTT	TERT (rs7705526)	chr5	5p15.33	1286039	1286056	1286151	1286168	in2	62.5	1	0	0
AMPL3510163540	TTCTGGCTTTTATGTCTGTGATAGCA	CCTATAGAATGGTGGAGAAAAGAGAAACA	NF1	chr17	17q11.2	29557694	29557720	29557831	29557860	in23	34.8	1	0	1	AMPL6794986624	2
AMPL3586428767	GGGCTGCAGCATATTCACAAAAT	GTGATAGTAGATCGAGAAAGCAAAAGGA	ZNF217	chr20	20q13.2	52193775	52193798	52193911	52193939	ex3-in2	30.7	1	0	1	AMPL6795193023	2
AMPL3659127744	CCCCTGACTCCGTCCAGTATT	GAGACACGCCCTTACCTTTCT	EGFR	chr7	7p12	55086912	55086933	55087052	55087073	ex1	73.3	1	0	1	AMPL2687294785	0
AMPL3659173907	CCATGGAATCTGTCAGCAACCT	TTCGCATGAAGAGGCCGAT	EGFR	chr7	7p12	55240623	55240645	55240745	55240764	in16-ex17	64.4	2	0	1	AMPL6795035115	2
AMPL3662034928	TGGTCATCCAAACTCAAACTTGAGAAA	TCATCTTAAATTGAATTAATCTTCTGCTTTTGT	BRCA2	chr13	13q12.3	32973755	32973782	32973870	32973903	3UTR-out	41.6	2	0	1	AMPL841477737	3
AMPL3662080735	GCAAAAGGACCCCATATAGCACA	GTAGTCCTACTTTGACACTTTGAATGCT	BRCA1	chr17	17q21	41199617	41199640	41199741	41199769	in22-ex22-in21	55.9	3	0	0
AMPL3665048636	CTTACACCATCCTCAGCCAAGA	CATTTGTCCTCCACACCCTCTG	CDH1	chr16	16q22.1	68845656	68845678	68845781	68845803	ex7-in7	52.9	3	0	1	AMPL6795031458	3
AMPL3665288574	TCCTCGACATTGATTTCTGTTTTTACCT	ACAATGAATTCAAGTTACCTGTGATCCA	RB1	chr13	13q14.2	48951019	48951047	48951160	48951188	in12-ex13	36.8	1	0	1	AMPL3665288693	3
AMPL3669349409	CGGGATCGCACCCTCAG	AGCGCGGCTCTCCTTTAG	PALB2	chr16	16p12.2	23652589	23652606	23652720	23652738	ex1-DCTN5	67.8	1	0	0
AMPL3671484334	ATACAGTTTTAACATAGTATCCAGTGTGTGAAT	GCAATAAAGATACAGATTCCCCACAGTT	RB1	chr13	13q14.2	48916663	48916696	48916759	48916787	in2-ex3	25	0	0	0
AMPL3677940119	GCTGGTATATACTCCTTGCCACA	ACAAGAGGGTTTGAAGTGATTCATCAAT	MAP3K1	chr5	5q11.2	56174824	56174847	56174938	56174966	ex11-in11	43.5	3	0	1	AMPL6795228353	2
AMPL3690591008	CACTCCTGCAAGGCACACT	CACCCAGGGCTTCCATTG	NOTCH4	chr6	6p21.3	32190760	32190779	32190884	32190902	in2-ex2-in1	64.2	2	1	1	AMPL3690591008	1
AMPL3697201336	GCCACACAGAGCTGCTTGA	GGGCCTTGGCCTGGATAC	ARID1B	chr6	6q25.1	157519836	157519855	157519965	157519983	in15-ex16	42.3	2	0	1	AMPL6794994876	1
AMPL3697208455	GCATGAACCTTATGGGCAGCA	GAGTTTTAGCCTCCAGGACAGAA	ARID1B	chr6	6q25.1	157519945	157519966	157520080	157520103	ex16-in16	67	1	1	1	AMPL3697208455	2
AMPL3709542880	GAACCGGCTCCCGATCAG	GTCGCGGTGGGAGGAAT	ZNF703	chr8	8p11.23	37553632	37553650	37553776	37553793	ex1-in1	71.7	1	0	1	AMPL6794906339	1
AMPL3712074682	GCATCTTCAGTGTCCTGATTTTTACCAT	CCTTAGGTGAAAAACCATACAAATGTGA	ZNF217	chr20	20q13.2	52193669	52193697	52193797	52193825	ex3	43.6	3	0	1	AMPL6795220229	2
AMPL3715168525	CCCCCAAATCTGAATCCCGAG	CTCCTCAAGAATGATGGCACCTT	AKT1	chr14	14q32.32	105246385	105246406	105246495	105246518	in3-ex3	58.9	3	0	1	AMPL1492638100	1
AMPL3715171956	GCCGCTCCTTGTAGCCAAT	GGGTCTGACGGGTAGAGTGT	AKT1	chr14	14q32.32	105246476	105246495	105246583	105246603	ex3-in2	59.6	3	0	1	AMPL3430169584	2
AMPL3749540672	CGGGTAGTGGAAAACCAGGTAAG	AATAGCGCAGGAATGGGAGAAA	MYC	chr8	8q24.21	128748852	128748875	128748954	128748976	in1	36.3	2	0	0
AMPL3753971960	ACTGAAAATTGTAAAGCCTATAATTGTCTCA	GGTACACAGGTAATCGGCTCTAA	BRCA2	chr13	13q12.3	32920854	32920885	32921004	32921027	in12-ex13	24.2	0	1	1	AMPL3753971960	0
AMPL3767333280	AAGATACCTTGCTTGTTATAAGAGTAAAATTTG	GCAGGCATACTAATTTGAACAGAAACCT	NF1	chr17	17q11.2	29685943	29685976	29686072	29686100	in54-ex55-in55	35.1	1	0	1	AMPL565841541	2
AMPL3767409726	AGTAGGTTTTAGTTGCTTTGACACTCA	CCATTAAAACCAAAACCTGCAACAAAT	NF1	chr17	17q11.2	29685835	29685862	29685975	29686002	in54-ex55	24.6	0	0	0
AMPL3785538581	GAAGCCAGAGGCTGTTGGT	GCCTGGGACCACTGAGG	VEGFA	chr6	6p12	43741964	43741983	43742071	43742088	in1	67.4	1	0	0
AMPL3785959005	GGGAGAGTGATACAGATTCATTTGAAG	AAAAATCAGTTCATTTCAGAAAGAAGCTAGA	MDM2	chr12	12q14.3-q15	69230480	69230507	69230593	69230624	ex10-in10	26.4	0	0	0
AMPL3814205865	CTTTCAGCCTCAGGGATTTAGAGATAC	CCACTTGTACACATTGATTTCACAACAT	RAD51C	chr17	17q22	56811472	56811499	56811618	56811646	ex9	40.8	2	0	1	AMPL3677988471	2
AMPL387805586	GGCTCCTGACCTGGAGTCTT	CATCTTGGGCCTGTGTTATCTCC	TP53	chr17	17p13.1	7577489	7577509	7577611	7577634	ex7-in6	53.4	3	0	1	AMPL4981177402	2
AMPL387829477	CTCTGGCATTCTGGGAGCTT	ACTGCTCTTTTCACCCATCTACAG	TP53	chr17	17p13.1	7579483	7579503	7579590	7579614	ex4	52.3	3	0	1	AMPL6795075395	2
AMPL387841166	GCCACTGACAACCACCCTTAA	GGAAGGAAATTTGCGTGTGGAGTA	TP53	chr17	17p13.1	7578121	7578142	7578234	7578258	in6-ex6	54.8	2	0	1	AMPL4574207192	1
AMPL387884468	TCAGCTGCCTTTGACCATGAA	GAGGCCTTGGAACTCAAGGAT	TP53	chr17	17p13.1	7573824	7573845	7573970	7573991	in10-ex10	62.7	1	0	1	AMPL1481481122	1
AMPL387899835	CTGGAGTGAGCCCTGCT	TCCCCCTCCTCTGTTGCT	TP53	chr17	17p13.1	7573927	7573944	7574037	7574055	ex10-in9	62.8	2	1	1	AMPL387899835	1
AMPL388003993	AGTCGGGCTCTGGAGGAAA	GGCGCAGCTGATCTCAAG	EGFR	chr7	7p12	55087034	55087053	55087182	55087200	ex1-in1	78.5	0	0	0
AMPL388017387	GTGTCCTCTCTCCTCCATAGGT	GGACACTTCTTCACGCAGGT	EGFR	chr7	7p12	55221684	55221706	55221823	55221843	ex7	58.5	1	0	0
AMPL388035064	GCACCTCAAAGCTGTTCCGT	CAAGGGTGGTTGGGAGTAGATG	TP53	chr17	17p13.1	7577121	7577141	7577233	7577255	ex8-in7	45.2	2	0	1	AMPL1481474315	2
AMPL388229887	CTTCTATAAAGTTAGGTGTTTCCTGGGT	ACCCTGCTAGTCTGGAGTTGAT	BRCA1	chr17	17q21	41267659	41267687	41267784	41267806	in3-ex3	36.7	2	1	1	AMPL388229887	3
AMPL388230636	CCCAGTGGTATGTGGGAGTTT	AGGCAGAATGCTAGGTACAGATTTG	BRCA2	chr13	13q12.3	32900374	32900395	32900500	32900525	ex6-in6	31.1	1	0	1	AMPL1205191981	2
AMPL388285969	TGGTAACTCAGACTCAGCATCA	TGTGTGAACGGACACTGAAATATTTTCT	BRCA1	chr17	17q21	41215782	41215804	41215928	41215956	in17-ex17	38.4	1	1	1	AMPL388285969	1
AMPL388739660	GGGATGTGATGAGAGGTGGAT	CCATCCTCACCATCATCACACTG	TP53	chr17	17p13.1	7577372	7577393	7577509	7577532	in7-ex7	60.7	2	0	1	AMPL3426752792	2
AMPL388972459	GACAGCATAGACGACACCTTCC	TGTCTGCAAATCTGCCACTGT	EGFR	chr7	7p12	55270285	55270307	55270431	55270452	ex27-in27	60.8	2	0	1	AMPL6795176497	2
AMPL390743234	CCAGCTTCATAGACAAAGGTTCTCT	AGTTGAATATCTGTTTTTCAACAAGTACATTT	BRCA1	chr17	17q21	41249227	41249252	41249367	41249399	in8-ex8-in7	29.3	1	0	0
AMPL391535344	TGGAGAAGTTAGACATGTCAACCTTTTG	ATTTACCTGGGCTACTTCATCTCTAGAA	PIK3CA	chr3	3q26.3	178936910	178936938	178937043	178937071	in10-ex11	35.8	2	1	1	AMPL391535344	3
AMPL391623903	GAGCCTGCACTCCACAGA	CTGACCACGGCCTGGAC	NF1	chr17	17q11.2	29422203	29422221	29422354	29422371	ex1-ex1	76.9	1	1	1	AMPL391623903	0
AMPL391625689	CACAGGCCGGTGGAATG	CTCCTACCTCCCCTCACCTA	NF1	chr17	17q11.2	29422337	29422354	29422441	29422461	ex1-in1	73.9	1	1	1	AMPL391625689	1
AMPL391723468	TTGAAGGCGTATACAGGAACAATATTGA	AGAGCACTACAATAATAGTTTACATCACAA	PTEN	chr10	10q23.3	89653827	89653855	89653962	89653992	ex2-in2	25.9	0	0	0
AMPL392174806	CGACAGCATGCCAATCTCTTCATA	CCATGATGTGCATCATTCATTTGTTTCA	PIK3CA	chr3	3q26.3	178951919	178951943	178952063	178952091	ex21	38.8	2	0	1	AMPL1497305257	3
AMPL393459590	CAGAGTAACAGACTAGCTAGAGACAATGA	GCACTTACCTGTGACTCCATAGAAA	PIK3CA	chr3	3q26.3	178935995	178936024	178936105	178936130	ex10	39	3	0	1	AMPL393459515	3
AMPL393467543	AGCCATTTCCATCCTGCAGAAG	TCCTTTTGTTTCTGCTAACGATCTCTTT	PTEN	chr10	10q23.3	89624139	89624161	89624241	89624269	ex1-ex1	56.8	3	0	1	AMPL1483280789	1
AMPL393715573	GAAAGCTGTTTCATATAGATTTTGGACACTT	CATTCTTGGGCTCCTTTACTAATCACTA	PIK3CA	chr3	3q26.3	178948008	178948039	178948112	178948140	ex20	32.4	2	0	0
AMPL3951202842	AACCTTCTGCCTTTGATGTTACAGAT	CCCATGCCTGTCCAATCAGATG	CCND1	chr11	11q13	69467573	69467599	69467710	69467732	ex5	32.1	1	1	1	AMPL3951202842	3
AMPL396131490	CATCATCATGACCTGCCAGAGAG	AAATTGGAAACTGGAAGCAAATGTAG	CDKN2A	chr9	9p21	21971196	21971219	21971329	21971355	in1	60.4	2	0	0
AMPL4007540828	ACCAATGATCCTGCCGTGTTT	TCCTCCCCACGTTCGATCT	ARID1B	chr6	6q25.1	157505336	157505357	157505482	157505501	in11-ex12	46	2	0	1	AMPL6795167376	2
AMPL4007554706	CAGTATATTCAGTACCTGTTTGCCTTTG	CTTTCCTGGGCCAGTGACT	ARID1B	chr6	6q25.1	157505449	157505477	157505586	157505605	ex12-in12	64.5	2	0	1	AMPL6795200702	1
AMPL401978644	GACGTGCACAACCTCGACTA	CTCGGTCAAACAAGGCCTCA	FGFR3	chr4	4p16.3	1807862	1807882	1808012	1808032	ex14-in14-ex15	70.2	1	1	1	AMPL401978644	1
AMPL403101756	CCACTATAAGGACCCTCCCTTCTG	AAAAGACCGTTGGACTCACGA	ERBB2	chr17	17q12	37873599	37873623	37873731	37873752	ex15	62.4	2	0	1	AMPL6794998986	1
AMPL403768696	GCTGTCCCTTGGGACTGTCTA	CATGCGGGAGAATTCAGACAC	ERBB2	chr17	17q12	37882709	37882730	37882858	37882879	in23-ex24	61.2	1	0	1	AMPL6795164493	1
AMPL403794317	GGCCAAGATTCCGGGAGTTG	GGCATACTGGACTCATCTCTCCTT	ERBB2	chr17	17q12	37882839	37882859	37882974	37882998	ex24-in24	63.8	1	0	1	AMPL6795191684	2
AMPL404057818	TTTTCATGTTAGATGGGATCCTTTCCAA	AGTTTGAGCTGATGATTTAAGACAGTGT	MET	chr7	7q31	116403198	116403226	116403338	116403366	ex11-in11	31.9	2	0	1	AMPL5027724664	3
AMPL405370004	GCCAACTCACCTGTGACATTC	GCCCAACAATAGGACAGTGCTT	FGFR2	chr10	10q26	123324942	123324963	123325066	123325088	ex3	51	2	0	1	AMPL6795209463	3
AMPL405393692	GACCCAAAGGGCAGTAAGATAGG	TCCCTAGGAGGAACCTCAGTG	FGFR1	chr8	8p11.23-p11.22	38285827	38285850	38285972	38285993	in4-ex4-in3	47.2	1	1	1	AMPL405393692	1
AMPL4072340160	GCATGTCAACATCGCTCTAATTCA	GCTTTTCAAAAGGCTTAAACACAGGATT	MET	chr7	7q31	116403104	116403128	116403250	116403278	ex11	40.7	2	0	0
AMPL407454677	GGTCCTATTCTAAAAGCCAGAGCTT	GATTAGGGCTGTGTACGTGCT	CDH1	chr16	16q22.1	68853146	68853171	68853291	68853312	in10-ex11	53.7	2	1	1	AMPL407454677	3
AMPL407548570	GAGGATTTTGAGCACGTGAAGAAC	AAAGAATGAACTCTTCCCTCCAAAAGAA	CDH1	chr16	16q22.1	68853268	68853292	68853395	68853423	ex11-in11	54.8	3	0	1	AMPL6795207779	2
AMPL408295050	GGCAGCTAGTGGCTGTCTAA	CTCTCCTCCGAAGAAACAGCA	CDH1	chr16	16q22.1	68861955	68861975	68862094	68862115	in13-ex14	54.2	0	0	0
AMPL408403101	CCAGTTCTGATTCTGCTGCTCT	CCACTGAGCTACCAAGGTTTTCAAA	CDH1	chr16	16q22.1	68862073	68862095	68862213	68862238	ex14-in14	54.6	2	0	1	AMPL6794973416	3
AMPL408517815	TGCTAGCAGTCTTGGTACTTTGTAA	TGTATACAGCCTCCCACGCT	CDH1	chr16	16q22.1	68847167	68847192	68847298	68847318	in8-ex9	51.4	3	1	1	AMPL408517815	3
AMPL408614224	TGATGCTGATGCCCCCAATAC	GCATCTTGCCAGGTACCATACAAA	CDH1	chr16	16q22.1	68847275	68847296	68847399	68847423	ex9-in9	45.2	3	0	1	AMPL1522554799	1
AMPL409175773	TGGTACCTTTTGAGGTCTCTCTCA	GCCAAAGTCCTCGGACACTTC	CDH1	chr16	16q22.1	68849473	68849497	68849576	68849597	ex10	56.3	3	0	0
AMPL409211834	TGTGCCTCCTGAAAAGAGAGTG	AGTTGCTGCAAGTCAGTTGAAAAAT	CDH1	chr16	16q22.1	68849555	68849577	68849674	68849699	ex10-in10	50	3	0	1	AMPL1984952722	2
AMPL410030435	GGGACAGGGTTGTGTCGAAAT	GCAGCAGGGATATAGTATCTGACAGTA	RB1	chr13	13q14.2	48951140	48951161	48951278	48951305	ex13-in13	29.7	0	0	0
AMPL410137458	GCTGCCCGTGAAGTGGAT	GTCCTGGCTCTGCCCAG	FGFR3	chr4	4p16.3	1807989	1808007	1808098	1808115	ex15-in15	60.9	0	0	0
AMPL4102906940	CCTTAGCTCCTACAGAGTTAAAATGCT	TCATGTTTAGAGTTGGGCAGAGG	NCOR1	chr17	17p11.2	16046850	16046877	16046997	16047020	in11-ex11	36.4	1	1	1	AMPL4102906940	2
AMPL410407018	CCTTCGGTGACTGATGATCTAAGTT	AAGTATTTCAATGCCGGTAGGGA	CDKN2A	chr9	9p21	21968171	21968196	21968321	21968344	ex4-in3	54	1	1	1	AMPL410407018	1
AMPL410561093	CATGGACAGGTCCAGGTACTC	GCATCGTGGCCTTGACCTC	FGFR1	chr8	8p11.23-p11.22	38271302	38271323	38271442	38271461	in17-ex17	69.2	1	0	1	AMPL6794952927	1
AMPL410860714	CAATGGGCAATGAAAATGTACTGGAAAT	GGTGTTGTATAAGATACAATGGCCAAGT	MET	chr7	7q31	116403291	116403319	116403402	116403430	ex11-in11	29.8	1	0	0
AMPL4132276970	CTGAGCCCTCTGTTTACAGGT	GCCACGTTATAGAGAGAGTCAACTGA	ERBB2	chr17	17q12	37863439	37863460	37863564	37863590	ex6	47.6	1	0	1	AMPL6795009397	1
AMPL4169109534	AATTTCTATTTCTGTTTCAACATTGAGAGCTG	GCCTTGAGTCAACTGAGTTTAACTGT	CHEK2	chr22	22q12.1	29106012	29106044	29106111	29106137	ex8-in7	22.1	0	0	0
AMPL418006945	GGTGGAGGCGGGAACTG	CCTGAGACTCCCAGGACAGA	FGFR3	chr4	4p16.3	1808085	1808102	1808225	1808245	in15	71	1	0	0
AMPL4220686609	ACAAAACGTGATACTATACAACAAAGGG	AGTGTCCACTCAGGAACTCTATTCTATT	CHEK2	chr22	22q12.1	29130357	29130385	29130487	29130515	in2-ex2	56.3	2	1	1	AMPL4220686609	1
AMPL4244229005	CTCTTCCAGAATCAGGGAAACTGA	CTTGATCAGGAGCACATTGCTTTG	APOBEC3B	chr22	22q13.1-q13.2	39388427	39388451	39388571	39388595	ex8	50.4	1	0	0
AMPL4245006839	CCAACTGCAAGGACGCTGTAA	CAGAGTGGGCAGCGGTA	APOBEC3B	chr22	22q13.1-q13.2	39378369	39378390	39378476	39378493	5UTR-ex1	48.3	2	1	1	AMPL4245006839	3
AMPL4245011909	GGCTGAACATGAATCCACAGATCA	GACTGGGATTCGTGTGGCA	APOBEC3B	chr22	22q13.1-q13.2	39378451	39378475	39378601	39378620	ex1-in1	75.6	1	0	0
AMPL4295234992	CAATGTTTTCTTTTCAGACTTGGCTTCA	CAAACGGTCCTTCTAGGTTGGA	E2F3	chr6	6p22	20490382	20490410	20490508	20490530	ex7	50.5	3	0	0
AMPL4295235112	CGGTTTTAAATGGGTCCAGAGCAT	GAGAGAAGCTCAAAGAGGATGAGG	ESR1	chr6	6q25.1	152415370	152415394	152415470	152415494	in6	51.9	2	0	1	AMPL6795134726	2
AMPL4295237153	GACAAGACTGAGTAAATGTGTGTGACTA	CTGGTTTGGGTAAGATTTTACTTGGTTG	EMSY	chr11	11q13.5	76224326	76224354	76224455	76224483	in9-ex10	34.3	1	0	1	AMPL6795032877	3
AMPL4295242169	GGTGCAGGGAAACCTGGAA	GGCAGGGCACCTTCTTCTG	ERBB2	chr17	17q12	37863334	37863353	37863465	37863484	ex2-in2	39.2	1	1	1	AMPL4295242169	1
AMPL4295251449	GGAAACGTTGCCTTAGAAGCC	GAATGAGGTGGAGGAACAAGGAA	EGFR	chr7	7p12	55240500	55240521	55240649	55240672	in16	45.7	2	0	0
AMPL4295270786	GGTTGGGTTTTCAATTAAGGCATTTACA	GGTATGTGCTTTTGGCAGTTTTCT	TOP2A	chr17	17q21-q22	38567448	38567476	38567582	38567606	ex10-in9	30.8	1	0	0
AMPL4295273515	GGTGTTAAAATCATCACACAACAGGTT	CAGTTTAGTTGTCATAATTGCACCATT	EMSY	chr11	11q13.5	76224429	76224456	76224536	76224563	ex10	44.4	3	0	0
AMPL4295276465	AGCTCACCTGTGCTTGAAAGTATTT	CTGGCGCTTGTGTTTCAACA	ESR1	chr6	6q25.1	152265183	152265208	152265337	152265357	in3-ex4	31.5	1	0	0
AMPL4295302263	CATGAACACTCTGGGTCTCCTAGA	GTCCAGGACTCGGTGGATATG	ESR1	chr6	6q25.1	152415447	152415471	152415569	152415590	in6-ex7	50.5	3	0	1	AMPL6795047862	3
AMPL4295306277	GGGAACAAGTATGTCCGAAATGT	CTTGTTTTATGTATGTCTCCTCTTCCCT	TBX3	chr12	12q24.21	115117353	115117376	115117466	115117494	ex4-in3	46.2	3	1	1	AMPL4295306277	3
AMPL4295314569	CTGGTATTTGTGCATGGAGTTCAATAT	GCTCGGTACAAGCGTGGTA	TBX3	chr12	12q24.21	115117427	115117454	115117557	115117576	ex4-in3	52.9	3	0	1	AMPL6795207288	3
AMPL4295334940	GGAACTAACTTTTCGTCCAAGCC	GGGCACCGAGATGGTCATTA	TBX3	chr12	12q24.21	115120500	115120523	115120629	115120649	in1-ex1	52.3	3	1	1	AMPL4295334940	2
AMPL4295433244	GTTGATAGAGTGGTAGACCTTGCT	CCAAATGGAGTGTTGCTGAGGT	RAD51C	chr17	17q22	56774145	56774169	56774288	56774310	ex3-in3	61.6	2	1	1	AMPL4295433244	3
AMPL4295447994	CCAAATTGCTTCTGTCTGTTAAATGGAA	TGTGGACTTTCTGAGAGAAAACAATTTAAGT	PIK3CA	chr3	3q26.3	178937016	178937044	178937116	178937147	ex11-in11	34.2	0	0	0
AMPL4295502807	GGCCAATTAAATCCACCATTCGG	GTCTTTCAGAGATTCCGGCTACTT	PALB2	chr16	16p12.2	23652651	23652674	23652788	23652812	5UTR-DCTN5	71.3	1	0	0
AMPL4295503531	GTCAGCAGATCCCAGTGGTT	CCCTGGCTCTTCTGTACAGGA	NOTCH4	chr6	6p21.3	32163776	32163796	32163925	32163946	ex30	71.5	1	0	1	AMPL657607869	1
AMPL4295507465	CCAGGAATAGCGGCGTCTG	CGCAAAGCCTGAAGGGATAGG	NOTCH4	chr6	6p21.3	32163906	32163925	32164013	32164034	ex30-in29	62.9	3	0	1	AMPL6795073866	2
AMPL4295511778	ATTAAAGTTTTCATATGTAAGACACGAGACACT	GACTGAAACAGCAGAGCTTCCT	PALB2	chr16	16p12.2	23640471	23640504	23640575	23640597	in6-ex6	40.3	3	1	1	AMPL4295511778	3
AMPL4295517176	TGCCTGGGTTTATGCTATCAGAAG	AGCTTTGCTGCTGTTATAAGAGGAA	PALB2	chr16	16p12.2	23640551	23640575	23640693	23640718	ex6-in5	37	1	0	1	AMPL6794954299	3
AMPL4295538193	GATGCCGTCTGTGCAGGA	CCTTTGTCACAGGGCTGCTT	NOTCH1	chr9	9q34.3	139404376	139404394	139404530	139404550	ex18-in17	69.3	0	0	0
AMPL4295545630	CCTCCACCGGCGGTTAT	CCGCTTCCTAGAAGACCAGGTA	CDKN2A	chr9	9p21	21994014	21994031	21994134	21994156	off target	51.9	3	1	1	AMPL4295545630	2
AMPL4295548351	GGACTTTTCGAGGGCCTTTCC	GAGGGTTTTCGTGGTTCACATC	CDKN2A	chr9	9p21	21994114	21994135	21994249	21994271	off target	70.4	2	1	1	AMPL4295548351	1
AMPL4295567333	ATCTCTCACCTCATCTGTCCTGT	AGTATTCGGGTTGTAGGAGTCTTCT	MET	chr7	7q31	116435671	116435694	116435807	116435832	in19ex20	46.5	3	0	1	AMPL6794981319	3
AMPL4295579537	GGCGACAGCTGACTTGCT	GAGGGATTGGGTACTGGATCTG	MET	chr7	7q31	116312535	116312553	116312650	116312672	ex1-in1	64.3	2	0	1	AMPL6795041607	2
AMPL4295581283	AAGGTAAAATTGCAGCCCCTTT	TCTAGCCCACCTACGTGGTT	MET	chr7	7q31	116312629	116312651	116312733	116312753	in1	55.4	3	0	0
AMPL4295581893	GATGCCACCTGGAAAATACATGTT	AGAAAAAGGATCAGAAACTTGGTGGT	MDM2	chr12	12q14.3-q15	69217996	69218020	69218106	69218132	in5	47.1	2	0	0
AMPL4295583459	CATAAGGGTTTGTGTTAGACTGATAGCA	ACACCTGTTCTCACTCACAGATGTA	MDM2	chr12	12q14.3-q15	69218045	69218073	69218158	69218183	in5-ex6	54.7	1	0	0
AMPL4295587721	GGCTGGATTTCTTCCTCCTTGAT	CCTTATCTCTGTTTCCCTTTCAGGTG	FOXM1	chr12	12p13	2968699	2968722	2968826	2968852	ex10	50.5	3	0	1	AMPL6795020450	2
AMPL4295590370	CTATCCCCTCCTCAGCTAGCA	ATAGATTTTAAGACTTCAAAACGACACAAAGAG	FOXM1	chr12	12p13	2968805	2968826	2968907	2968940	ex10-in9	47.6	3	1	1	AMPL4295590370	3
AMPL4295596072	TTCAAATGTGTGCAGAAGGAGGT	CTTCAAAGTTCTAGCGGGAGAGAAG	CCND1	chr11	11q13	69456214	69456237	69456362	69456387	ex1-in1	61.9	1	1	1	AMPL4295596072	1
AMPL4295625600	CAAGGTCATTTGCTGTGTTTGTTGA	AGGTGCCATAAATGCAATTGTCC	MAP3K1	chr5	5q11.2	56183177	56183202	56183321	56183344	in17-ex18	47.5	2	0	1	AMPL6794954756	2
AMPL4295626925	GCAGGAGAGTTTCAGGGACAATTAC	TAATTTAGTATAATGCTGTTACACAGAATTCCA	MAP3K1	chr5	5q11.2	56183294	56183319	56183385	56183418	ex18-in18	40.3	3	0	0
AMPL4295630685	ATGAAGAGGAACAGATGTGTCCTATTTG	AGAGCAACTGTGTTGAGTAAGCAT	MAP3K1	chr5	5q11.2	56167745	56167773	56167880	56167904	ex7-in7	47.2	2	0	1	AMPL6794999911	1
AMPL4295750852	CTCTCCTCTCTCCCCACTCT	CTTGCTGATCCCAGTCCACTT	GATA3	chr10	10p15	8111413	8111433	8111563	8111584	in4-ex5-in5	56.5	1	0	0
AMPL4295780118	CCGCAGGCCTCTGAGTC	CGCCACCGAGTTGAGTTT	ZNF703	chr8	8p11.23	37554608	37554625	37554743	37554761	in1-ex2	67.2	1	1	1	AMPL4295780118	1
AMPL4295786251	CAGCCCCATTGAGGTCAGT	CTGATCCCTCGGTTTTCTTCCC	ZNF703	chr8	8p11.23	37553728	37553747	37553874	37553896	in1	77.3	1	0	0
AMPL4295812948	ACAACTGTAGTGTTCCTTGCAGAT	TCAGTGCTTACTCCCCATGAAATTAAATT	ZNF217	chr20	20q13.2	52185659	52185683	52185761	52185790	ex5	35.4	3	0	1	AMPL6795121632	3
AMPL4295815093	CCATTCGCTTCTCAAAGGATGAAGTAA	GGTCAGTTTGGTTCTATGTATTACGCT	ZNF217	chr20	20q13.2	52185735	52185762	52185876	52185903	ex5-in4	27.8	1	0	0
AMPL4295844213	CTTCTTCGAACTTTTAGGAAGCTCAGT	GCTGGGATTGACTTCTTGCTCAA	ZNF217	chr20	20q13.2	52199514	52199541	52199657	52199680	ex1-5UTR	41	3	1	1	AMPL4295844213	3
AMPL4295846570	TCTCTTTGTCTCCATTGAATGAGTGTTT	TCTCTTCGCTCTGAGTGTAGC	ZNF217	chr20	20q13.2	52199627	52199655	52199734	52199755	5UTR-ex1	42.5	3	0	1	AMPL6795123739	3
AMPL4295854898	GTTGTTATCCCTATCATTATCATCACCATCT	GGAGAGGGAGAAGTGCTAAAGTCA	VEGFA	chr6	6p12	43746549	43746580	43746666	43746690	in4-ex5-in5	37.1	3	1	1	AMPL4295854898	3
AMPL4295861972	CCATGCCTTGCTCTCTTTCTGT	CCTCCCCACAGTTCTGAAGAAAAA	VEGFA	chr6	6p12	43742050	43742072	43742196	43742220	in1-ex2-in2	60.8	2	0	1	AMPL6794917937	2
AMPL4295867623	ACATGTGAAACTAAACCCAGTGAACA	CCTTACTGGGACACTCAGATCCA	TOP2A	chr17	17q21-q22	38548157	38548183	38548263	38548286	in32	32.1	1	1	1	AMPL4295867623	1
AMPL4295868277	TGTAGCCAGGATTAGAACCCAGT	GCTTGACACATTTAGAATTGGTTGTC	TOP2A	chr17	17q21-q22	38548241	38548264	38548386	38548412	in32-ex32-in31	35	1	1	1	AMPL4295868277	2
AMPL4295880923	CTTCCCCACATCACATCTTGTCT	GACCCAGGGTCTCCACAATT	FOXM1	chr12	12p13	2974424	2974447	2974539	2974559	in6-ex6	53.8	3	0	1	AMPL6795059250	1
AMPL4295885768	AGAACCTTACTGATTCCAAGTGCTC	GTGTTTTTCCCAATCCGGTCAAATT	FOXM1	chr12	12p13	2974511	2974536	2974623	2974648	ex6-in5	58	3	0	1	AMPL6795090874	3
AMPL4295885909	CCACGCTGGCCAATGTC	GCTGTTTCACCCCCACCAC	FGFR3	chr4	4p16.3	1806630	1806647	1806737	1806756	ex10-in10	68.1	1	0	1	AMPL6795230952	0
AMPL4295885965	CGGCCAGAAGCCTGACTG	GACCACCTGGAGCCCTTT	FOXM1	chr12	12p13	2983039	2983057	2983166	2983184	in2-ex2	54.5	3	1	1	AMPL4295885965	3
AMPL4295886888	GCCAGCGTTGGCTGTAG	CATACACCCGTCCCAGGAG	FGFR3	chr4	4p16.3	1806713	1806730	1806837	1806856	in10	64.8	0	0	0
AMPL4295891819	TCCCTGGAAGACCACATACCA	ATGCCAAAAGGACAGAAGTGAC	FOXM1	chr12	12p13	2983124	2983145	2983234	2983256	ex2	56.7	3	0	1	AMPL6795250016	2
AMPL4295895910	CTGAGGAAGGCATGGTTCGT	ACCCAAGATGAAATAAAACGTCTCTCTT	FGFR2	chr10	10q26	123239404	123239424	123239547	123239575	ex18-in17	45.2	2	1	1	AMPL4295895910	3
AMPL4295897088	AAATACAATCTTACTCCTGCTGACATCA	AAATGGGAGTTTCCAAGAGATAAGTGAG	FGFR2	chr10	10q26	123263168	123263196	123263298	123263326	in10	41.7	2	0	0
AMPL4295910025	GCCTGGCATCCAATTACAATTAGAGAT	ACAGTGAAACTTGGTACTTCATGGT	FGFR2	chr10	10q26	123324847	123324874	123324962	123324987	in3-ex3	47.2	3	0	1	AMPL6795242548	3
AMPL4295913808	CAAGCTGGGCTGGGTGT	GCTTCCTCTCGCCCATCA	FGFR1	chr8	8p11.23-p11.22	38271172	38271189	38271325	38271343	ex18-in17	65.7	1	1	1	AMPL4295913808	1
AMPL4295926862	AGCAAGCTTCAAAACTGTCTTCCT	TCTTTGTAACAGAGGATCCTTGGGTTA	EMSY	chr11	11q13.5	76256713	76256737	76256856	76256883	in19-ex20	38.3	2	1	1	AMPL4295926862	2
AMPL4295941265	CCTGTTACCTGTCGCCATCT	CCTGAGAGTCACCCACCTG	EMSY	chr11	11q13.5	76156059	76156079	76156169	76156188	ex1	59.3	3	0	1	AMPL6795056808	3
AMPL4295942169	CTTTTAGATGAGCCCCGAAAGG	CCACGATCCCGTTAGGAAACAA	EMSY	chr11	11q13.5	76156143	76156165	76156283	76156305	ex1-in1	71.4	1	0	1	AMPL6794963294	1
AMPL4295957242	ACCGGAGTAACCTTCCCTCAT	TGTTTCCAGACAAGCCACTCAC	EGFR	chr7	7p12	55270177	55270198	55270318	55270340	in26-ex27	57	2	0	1	AMPL3695253731	3
AMPL4295963474	GAGCTAGGAGAAAGCGGTCAT	GGCCATAAGCTTTGAAACTTGGAAA	E2F3	chr6	6p22	20480092	20480113	20480232	20480257	ex2-in2	43.3	2	0	1	AMPL6794962274	2
AMPL4295964778	GAGGGCAAATACAGCTTTGGTG	TCCACCCAAAGACTCTCCAAGAT	EGFR	chr7	7p12	55221800	55221822	55221925	55221948	ex7-in7	61.5	3	0	1	AMPL6795028527	3
AMPL4295966898	CTTTCCTTATTCTCCTTGGTATGGCA	TGGTTGTCTGCTGACATTGTATTTATTT	E2F3	chr6	6p22	20480207	20480233	20480329	20480357	in2	44.8	3	0	0
AMPL4295981408	CCCGCCCTCCTCTCTTG	CAGTGGACTAGCTGCTGGA	CDKN2A	chr9	9p21	21968302	21968319	21968413	21968432	in3	56.8	3	0	0
AMPL4295983581	TCTCACATTGTTTCAAAACTGGAAATGG	TGTGGGTAGCAATAATCTAAACCTCTTG	TOP2A	chr17	17q21-q22	38559100	38559128	38559237	38559265	in20-ex20	46.4	1	1	1	AMPL4295983581	1
AMPL4295985829	AACTTGAGTGACATCTCATTTTGGT	GGGAACCTTTCCTGAAGATGGA	TBX3	chr12	12q24.21	115107899	115107924	115108007	115108029	3UTR-OUT	48.8	3	0	0
AMPL4295986051	GAAGATACTAAACCCTCCCCTGACT	GTTGTTGATGAGTTCTTTGGTTTTCTGTA	TBX3	chr12	12q24.21	115107982	115108007	115108117	115108146	3UTR-ex8	32.4	1	0	1	AMPL5100539472	2
AMPL4296021433	GGGATGGACCAGGTGACG	GCCTTCTACTGCCAGTGTCT	NOTCH4	chr6	6p21.3	32171807	32171825	32171927	32171947	in19-ex19	61.2	3	0	0
AMPL4296035078	AAGCAGAATCCTTACCTGTTGAAGAG	CCTATACCTGGGCAAGGCTACTTA	NCOR1	chr17	17p11.2	15938064	15938090	15938178	15938202	ex45	59.6	2	0	1	AMPL6795065989	2
AMPL4296037867	CGACTCTGGTAAGCGAAGCC	TGAGCTCCCAAATCTCTCCAGAT	MYC	chr8	8q24.21	128751258	128751278	128751374	128751397	in2	50.5	3	0	0
AMPL4296040749	AGCCCTCCCCTCCAACAT	GGAGCAGCTCCATTTGCTG	CCND1	chr11	11q13	69458446	69458464	69458596	69458615	in2	77.4	1	0	0
AMPL4296058622	AGGCCATTATCTCTGATGCTTTTT	CTCTGAAGTTTGATTCTTTCCGCTAAAC	MAP3K1	chr5	5q11.2	56174745	56174769	56174846	56174874	in10-ex11	37.2	3	1	1	AMPL4296058622	3
AMPL4296058736	TCTACCAGGACATACCAAAGCAAAAC	CCATTAAAGTTCCAGTTCCCACATC	MAP3K1	chr5	5q11.2	56179365	56179391	56179470	56179495	ex15	42.5	3	0	0
AMPL4296058983	GCATTTTCTTCTTGTTATCAGGCTCAA	TTCTTTTTACTGAACATGCTTCATTTTGTGA	MAP3K1	chr5	5q11.2	56179444	56179471	56179544	56179575	ex15-in15	33.8	1	0	0
AMPL4296063325	TTTAGAAGTTCTTGTGAACCACAGATGT	CATTGGGTCTGAAGGTTCTAGTTGAAA	MAP3K1	chr5	5q11.2	56161106	56161134	56161226	56161253	in4-ex5	39.8	3	0	1	AMPL4578091067	1
AMPL4296063350	CGTGGAACATTCTGTATTCATCTGCTAT	CCTAAGAATATGCTAACAATTTTACTCTAAGCA	MAP3K1	chr5	5q11.2	56161182	56161210	56161298	56161331	ex5-in5	33.7	1	1	1	AMPL4296063350	1
AMPL4296066331	GTTCGACAAGCTGCCAATAAAGATAG	AGGAATTTCCATCTTGCTCTCAAAGT	ARID1B	chr6	6q25.1	157527624	157527650	157527772	157527798	ex19	53.7	2	1	1	AMPL4296066331	1
AMPL4305145671	CCCCACTCAACAGCGTGT	CCTCGCGCACCGTGTAG	ESR1	chr6	6q25.1	152129340	152129358	152129460	152129477	ex1	69.9	2	0	1	AMPL618818857	1
AMPL4306038770	CTAGCAATGGTGGCTGAAAGAC	AACTTGGTTAAAAAGTTCCATTCAGAAAA	NCOR1	chr17	17p11.2	16046969	16046991	16047088	16047117	ex11-in10	29.6	1	0	0
AMPL4310685450	CCACCGAGCACATTCAGACTC	TGCTTTTCTCTTGCTGCTCTTCA	ARID1B	chr6	6q25.1	157527752	157527773	157527869	157527892	ex19	54.6	3	0	1	AMPL6795051366	1
AMPL4310982847	AGCAGAAAGTGTTTTTAGCATATCCGT	CTTCATCAAGCATGCCCAACAAG	MAP3K1	chr5	5q11.2	56167659	56167686	56167772	56167795	in6-ex7	31	1	0	0
AMPL4310991361	ACTAATTTCACAAAATCTTACTCCTTTAACAGT	CTTTCAGCCATTCAGTGTCTTCTCTATA	MAP3K1	chr5	5q11.2	56179293	56179326	56179395	56179423	in14-ex15	38.6	3	0	1	AMPL6795285313	2
AMPL4311556825	CACCAATGCCTGAGCAGGA	GTCCCTGTCCCGCTCTTTTT	APOBEC3B	chr22	22q13.1-q13.2	39378295	39378314	39378416	39378436	5UTR-ex1	54.4	2	0	1	AMPL6795022309	2
AMPL4311570124	TGGGAAAACTTTGTGTACAATGAAGGT	AGGAGGATGAGCAGGTGAGAG	APOBEC3B	chr22	22q13.1-q13.2	39382317	39382344	39382451	39382472	ex4-in4	48.1	2	0	1	AMPL6795006650	2
AMPL431562225	ACCGATTATCAAGCAGAAGCACAA	GGTTTGAACACGAAAGAAATGTACCT	CHEK2	chr22	22q12.1	29083704	29083728	29083851	29083877	3UTR-ex16	31.5	1	0	0
AMPL433098497	CCAGAGGAAGAATTATAACCCAGAAACA	TTTTCCCATTCACTTCATATGATCTGGATT	RAD51C	chr17	17q22	56811566	56811594	56811690	56811720	ex9	29.9	1	1	1	AMPL433098497	2
AMPL4388397190	AATGTTATGAAAATGATCAGTTCATTTCATCTT	GCGACTTCCAACATTCTTCATTGTATTT	INPP4A	chr2	2q11.2	99203842	99203875	99203956	99203984	in25-ex26	37.8	1	1	1	AMPL4388397190	1
AMPL4388397255	GAGAGAACATCCCTGAGTCACA	CCAGATGATGTACTGGAAAGGATAAGAA	INPP4A	chr2	2q11.2	99169125	99169147	99169232	99169260	in14	44.2	3	0	1	AMPL6795077818	2
AMPL4388397269	GCACATCATCACCAATGACATCA	GCTGTGAGCTCATACCTGGAG	INPP4A	chr2	2q11.2	99136490	99136513	99136643	99136664	ex3-in3	67.9	1	1	1	AMPL4388397269	1
AMPL4388399209	AACAAAGTATCATTCCTTCCTCCACAG	TGGACACTGTCCTGAATCTCAATG	TERT (rs2736108)	chr5	5p15.33	1297325	1297352	1297459	1297483	off target	52.8	2	1	1	AMPL4388399209	2
AMPL4388399369	GGCAGGTGAGCCTCACA	GAAGGATGCCAAACCAGGGTA	INPP4A	chr2	2q11.2	99136613	99136630	99136735	99136756	in3	61.3	3	0	1	AMPL6795014937	2
AMPL4388399469	GGTGCCCTACTACCTGGAGAA	CGCAGCTCCCTAGGCTCT	ESR1	chr6	6q25.1	152129428	152129449	152129574	152129592	ex1-in1	79.4	0	0	0
AMPL4388401207	ACTGGCACTGACTGCAACT	CATCGAATTTGTACCAAGGCATGAATT	APOBEC3B	chr22	22q13.1-q13.2	39382206	39382225	39382347	39382374	in3-ex4	55.3	1	0	1	AMPL6794909595	1
AMPL4388402045	CAGTGAGGGTTGTCGAAGAGA	GTGTTCACGTTTCAACTTTTCCGTAA	INPP4A	chr2	2q11.2	99203936	99203957	99204049	99204075	ex26	45.2	3	0	1	AMPL6795056035	2
AMPL4388403009	ACATGTTTCAGCACACACTGAGA	TCTGTGACCACCTGTTATCCCAT	TERT (rs2736108)	chr5	5p15.33	1297437	1297460	1297582	1297605	off target	59.3	2	1	1	AMPL4388403009	2
AMPL4388405337	CTGTCATCCTTTTCAGATTCTGGAGAA	GCGTAGTAACTCACTTGGGTTTTCA	INPP4A	chr2	2q11.2	99169192	99169219	99169331	99169356	ex14-in15	47.8	2	0	1	AMPL6795001817	1
AMPL461256191	GGGAGGCTATTCTGCCCATTTG	AAAGGCAAGTGGACTTCGGT	MYC	chr8	8q24.21	128748752	128748774	128748875	128748895	ex1-in1	56.9	3	1	1	AMPL461256191	3
AMPL462566756	TTCTCTCCGTCCTCGGATTCT	GTATCCAGCCGCCCACTTT	MYC	chr8	8q24.21	128751154	128751175	128751292	128751311	ex2-in2	69.5	2	0	1	AMPL1185453124	1
AMPL464273495	ATCTCAACTGAATGGAATGAACGACA	AAGCTGTGTTACTTCAAAGGAGGTTTAT	PIK3R1	chr5	5q13.1	67576798	67576824	67576901	67576929	ex7-in7	35.9	3	1	1	AMPL464273495	3
AMPL467730576	GCCGCTCACCCTGTGTTC	CCTCCGCCTCTGGCATTTT	CCND1	chr11	11q13	69458578	69458596	69458683	69458702	in2-ex3	54.5	3	0	1	AMPL6795239778	1
AMPL470763028	AATAAAATAACTGGCAAATATATCATTGAGCCA	CCTTTCTTAAGACCACCCTCTGAA	MYC	chr8	8q24.21	128753640	128753673	128753753	128753777	ex3-3UTR	43.2	2	1	1	AMPL470763028	2
AMPL492733889	GTCTTTTGACGAGAGGGAGGAT	AGCAACTTAAAACAAGACATAGCTCCA	PIK3R1	chr5	5q13.1	67597452	67597474	67597569	67597596	ex16	50	3	0	0
AMPL492786667	TGGAGCTATGTCTTGTTTTAAGTTGCT	GCCAAAAGGTAGCTGTTTTAGAAAGATT	PIK3R1	chr5	5q13.1	67597570	67597597	67597682	67597710	ex16-3UTR	29.1	1	0	0
AMPL492910604	GAATTCTTATCCCCTGCCCCTT	CGTCAGCCTCCACACTCTTG	CCND1	chr11	11q13	69467775	69467797	69467889	69467909	ex5-ex5	32.3	2	0	1	AMPL6795237657	2
AMPL548966253	AAAGGCGACTCTGAAGAGCAG	CTTGATGTTCCGGTGACTTTTGG	ARID1B	chr6	6q25.1	157527859	157527880	157528003	157528026	ex19	54	2	0	1	AMPL6794930884	2
AMPL564735788	GATATGTTTGCTGCAGGGCCTATA	CTCTTGATTCAGCTTACCTCTTTCATAGT	MDM2	chr12	12q14.3-q15	69207261	69207285	69207396	69207425	in2-ex3	33	1	1	1	AMPL564735788	2
AMPL570903160	TGTTGTGAAGTTTCAGAGTGGCA	CTCCTCCAATCAGGAAAGAGTTAGG	MAP3K1	chr5	5q11.2	56160551	56160574	56160695	56160720	ex4	53.3	2	1	1	AMPL570903160	1
AMPL574223771	ACAATGTACACATGTAACACCACAAAGA	TACCTTCACAAACTTTGGTGTATGAAAC	BRCA2	chr13	13q12.3	32900250	32900278	32900394	32900422	ex5-in5-ex6	28.2	0	0	1	AMPL5355186186	1
AMPL622481152	ACACACTATGGCATGAATGAATCCA	CTGAATGTTACTGAAAATGAAAACAGGGT	RAD51C	chr17	17q22	56811672	56811697	56811778	56811807	ex9-3UTR	26.8	0	0	0
AMPL622910927	ACTGAAATTTACACTTACTAGGCAAAGA	GGTGTACATAAAGCTTCAAATGGCAATAA	PALB2	chr16	16p12.2	23614366	23614394	23614502	23614531	3UTR-ex13	27.5	0	1	1	AMPL622910927	0
AMPL651374266	GTCAGTGGAACCCTTCTTGGT	GCTAGACATTTTTCGGTTTCTGGTC	GATA3	chr10	10p15	8115610	8115631	8115739	8115764	off target	36.7	2	0	0
AMPL651471124	CGTAGCTGCCCTGGTAGGTTT	CTGAAGACCCAGGTCCAGATG	TP53	chr17	17p13.1	7579365	7579386	7579502	7579523	ex4	68.4	2	0	1	AMPL6794971662	1
AMPL653339849	GACTATGAAGAAGGAAGGCATCCA	GATGTGGCTCAGGGAGGAC	GATA3	chr10	10p15	8115716	8115740	8115853	8115872	ex6	48.2	2	0	1	AMPL6794986118	3
AMPL653346943	CGCCCTCTCCAGACACAT	CCCTGTGAGCATCGAGCAG	GATA3	chr10	10p15	8115836	8115854	8115990	8116009	ex6	65	1	0	1	AMPL6795098239	2
AMPL657543895	ACACACTTGTGCCCCTTGTC	GAGACGTGGACGAGTGTCT	NOTCH4	chr6	6p21.3	32171882	32171902	32171999	32172018	in19-ex19	64.3	2	0	1	AMPL6795025796	2
AMPL703884514	CCCAGACATGACAGCCATCATC	ACATTTTCGCATCCGTCTACTC	PTEN	chr10	10q23.3	89624220	89624242	89624361	89624383	ex1-in1	43.3	2	0	1	AMPL6795192347	3
AMPL703999929	TCCAAACATTATTGCTATGGGATTTCCT	ATCTTTTTCTGTGGCTTAGAAATCTTTTC	PTEN	chr10	10q23.3	89653789	89653817	89653930	89653959	ex2-in2	28.9	0	0	0
AMPL704007908	ACAGTTAAAGGCATTTCCTGTGAA	GTAACGGCTGAGGGAACTCAAA	PTEN	chr10	10q23.3	89717557	89717581	89717695	89717717	in6-ex7	42.6	2	0	1	AMPL703854036	3
AMPL705681709	GGATACGGCCAGGCATTGAAG	TCATCTTCTGTCCCTTCCCAGA	TP53	chr17	17p13.1	7579258	7579279	7579385	7579407	in4-ex4	57	3	0	1	AMPL1481773781	2
AMPL706125298	GTCGAAAAGTGTTTCTGTCATCCAAA	TCAGATAGCGATGGTGAGCAG	TP53	chr17	17p13.1	7578209	7578235	7578362	7578383	ex6-in5	57.8	1	0	1	AMPL4392179183	1
AMPL706844244	CGCTTCTTGTCCTGCTTGCTTA	TCCTATCCTGAGTAGTGGTAATCTACTG	TP53	chr17	17p13.1	7576996	7577018	7577142	7577170	in8-ex8	61.6	2	1	1	AMPL706844244	1
AMPL707393388	CGCCTCACAACCTCCGTCAT	CTCTGTCTCCTTCCTCTTCCTACA	TP53	chr17	17p13.1	7578406	7578426	7578555	7578579	ex5-in4	62.3	1	0	1	AMPL6326144323	1
AMPL735887326	TCTAATTTTGTGACATTTGAGCAAAGAC	GAGCCAAGCATCATTGAGAAAAGATT	PIK3CA	chr3	3q26.3	178951797	178951825	178951942	178951968	in20-ex21	37.3	1	1	1	AMPL735887326	1
AMPL737593644	GGAGTAGTAAATGATGCCTGGTGT	GAATTACTCAGCTGCGGAGGAT	MAP2K4	chr17	17p12	12032402	12032426	12032534	12032556	in8-ex9	39.4	2	1	1	AMPL737593644	3
AMPL737613565	TCAACTAACACAAGTCGTGAAAGGAG	CGTGTTCGACCATTCATAAATCAGGTA	MAP2K4	chr17	17p12	12032509	12032535	12032609	12032636	ex9-in9	46.7	3	0	1	AMPL3450176918	2
AMPL737619629	GCTTCCCAATATTTTAACAGAGAGAGACT	CGTCCAATTTCTCCAAGGTCTTTCAA	MAP2K4	chr17	17p12	11984653	11984682	11984757	11984783	ex3	47.4	3	1	1	AMPL737619629	3
AMPL737628902	CTGGGATTTCACTGCAGAGGA	ACCAAAAATAATCATGGCATCACCTACT	MAP2K4	chr17	17p12	11984736	11984757	11984846	11984874	ex3	42.2	3	0	1	AMPL6795122590	3
AMPL737718679	GGTCAACAGTGGATGAAAAAGAACAAAA	TGCCATCTTCATTTGTCCCAATTAGATA	MAP2K4	chr17	17p12	11998899	11998927	11999045	11999073	ex4-in4	38.7	1	0	1	AMPL4576337466	1
AMPL753315302	AAGCAAGAATAAGATTGCTCCTTTCTA	CAAACGAGGTAGACATGAGTTCCATAC	MAP2K4	chr17	17p12	12011005	12011032	12011122	12011149	in4-ex5	27.5	0	1	1	AMPL753315302	0
AMPL753328174	TTTTTAGTCTCGTAACGGTTTTTCTCTA	CCGCATTACTACATCCAAATCCATAAGA	MAP2K4	chr17	17p12	11998788	11998816	11998932	11998960	in3-ex4	29.9	0	0	0
AMPL754717830	ATACTGAAAGGCTTTATACTCTTCTCATATTTT	GTTTATCAAAGGACCCAGCTCTCA	CHEK2	chr22	22q12.1	29105919	29105952	29106034	29106058	in8-ex8	22.9	0	0	0
AMPL766334235	CGAGATCCTCTCTCTGAAATCACTGA	ACATGCTGAGATCAGCCAAATT	PIK3CA	chr3	3q26.3	178936067	178936093	178936180	178936202	ex10-in10	33	1	0	0
AMPL766379119	AGCAAGAGGCTTTGGAGTATTTCA	AGAGTGAGCTTTCATTTTCTCAGTTATC	PIK3CA	chr3	3q26.3	178952040	178952064	178952155	178952183	ex21	37	3	0	1	AMPL392292511	3
AMPL783716772	TTTCAGGTGGAGCAGCCAATTA	GCCTGAATGGGAGATATGCTTGT	EMSY	chr11	11q13.5	76256835	76256857	76256963	76256986	ex20	47.7	3	0	0
AMPL803120884	TCTCAGAATCATCGGACTCAGG	ACTTAACATAACCAGTAAGCTAACTTGTTGT	MDM2	chr12	12q14.3-q15	69218137	69218159	69218270	69218301	ex6-in6	33	2	1	1	AMPL803120884	2
AMPL890443983	CTTCAAAAACCTGGAGGTCAGACT	GATGACTCAATGCTGTGTGTTCTC	MAP2K4	chr17	17p12	11984542	11984566	11984681	11984705	in2-ex3	25	0	0	0
AMPL948929446	GGAATAAGATGGTAGAATACCTGACAGACT	CACAGTAAAACCCACTAATACTTGAAGGT	NF1	chr17	17q11.2	29557859	29557889	29557957	29557986	ex24-in24	36.2	3	1	1	AMPL948929446	3

## Sheet: Table D_Tpanel_genes
	Gene amplicon read ratios, T panel, BLOOD										Gene amplicon read ratios, T panel, TUMOR
Gene Symbol	N observations	Mean	Std	Min	Q1	Median	Q3	Max		Gene Symbol	N observations	Mean	Std	Min	Q1	Median	Q3	Max
AKT1	88	1	0.3	0.1	0.7	1	1.3	1.8		AKT1	88	0.8	0.6	0	0.5	0.7	0.9	4.5
APOBEC3B	264	0.3	0.2	0	0.1	0.2	0.4	1		APOBEC3B	264	0.3	0.3	0	0.1	0.2	0.4	2.1
ARID1B	396	0.4	0.3	0	0.2	0.3	0.5	1.8		ARID1B	396	0.3	0.2	0	0.1	0.2	0.3	1.6
BRCA1	264	0.3	0.2	0	0.2	0.3	0.4	0.9		BRCA1	264	0.3	0.2	0	0.1	0.2	0.5	1.2
BRCA2	264	0.1	0.1	0	0	0.1	0.2	0.5		BRCA2	264	0.1	0.1	0	0	0	0.1	0.8
CCND1	308	0.5	0.5	0	0.1	0.3	0.7	2		CCND1	308	0.3	0.3	0	0.1	0.3	0.6	1.6
CDH1	572	0.5	0.3	0	0.3	0.5	0.7	1.9		CDH1	572	0.5	0.5	0	0.2	0.4	0.7	3.5
CDKN2A	264	0.4	0.3	0	0.2	0.3	0.5	1.6		CDKN2A	264	0.4	0.3	0	0.1	0.3	0.5	1.7
CHEK2	176	0.1	0.1	0	0	0	0.2	0.5		CHEK2	176	0.1	0.1	0	0	0	0.1	0.3
E2F3	176	0.4	0.3	0	0.2	0.4	0.6	1.4		E2F3	176	0.4	0.3	0	0.1	0.3	0.6	2.2
EGFR	352	0.4	0.3	0	0.1	0.3	0.6	1.4		EGFR	352	0.4	1.1	0	0.1	0.2	0.4	12.8
EMSY	264	0.5	0.4	0	0.2	0.4	0.8	1.8		EMSY	264	0.5	0.5	0	0.1	0.4	0.8	2.5
ERBB2	264	0.3	0.2	0	0.1	0.2	0.3	1.2		ERBB2	264	0.3	0.3	0	0.1	0.2	0.3	2.2
ESR1	220	0.3	0.4	0	0.1	0.2	0.4	2.1		ESR1	220	0.3	0.3	0	0.1	0.2	0.4	1.4
FGFR1	264	0.4	0.3	0	0.2	0.4	0.6	2		FGFR1	264	0.2	0.2	0	0.1	0.2	0.3	1
FGFR2	308	0.4	0.2	0	0.3	0.4	0.6	2		FGFR2	308	0.4	0.3	0	0.2	0.3	0.5	1.8
FGFR3	264	0.1	0.1	0	0	0.1	0.1	0.2		FGFR3	264	0	0.1	0	0	0	0.1	0.4
FOXM1	264	0.8	0.5	0.1	0.4	0.6	1.2	3.6		FOXM1	264	1	0.6	0	0.5	0.9	1.3	4
GATA3	132	0.2	0.1	0	0.1	0.2	0.3	0.7		GATA3	132	0.2	0.2	0	0.1	0.1	0.3	1.4
INPP4A	264	0.4	0.3	0	0.2	0.3	0.6	1.5		INPP4A	264	0.4	0.3	0	0.2	0.3	0.6	1.4
MAP2K4	440	0.4	0.4	0	0	0.3	0.6	2.2		MAP2K4	440	0.4	0.5	0	0	0.2	0.8	2.3
MAP3K1	572	0.4	0.3	0	0.2	0.4	0.6	1.5		MAP3K1	572	0.6	0.5	0	0.2	0.4	0.8	3.1
MDM2	308	0.2	0.1	0	0	0.1	0.2	0.7		MDM2	308	0.1	0.2	0	0	0.1	0.2	1.2
MET	308	0.5	0.4	0	0.2	0.3	0.6	3.3		MET	308	0.4	0.4	0	0.2	0.3	0.6	2.9
MYC	220	0.3	0.3	0	0.1	0.2	0.4	1.3		MYC	220	0.6	0.4	0	0.3	0.5	0.8	2.3
NCOR1	352	0.2	0.1	0	0.1	0.1	0.2	0.8		NCOR1	352	0.2	0.1	0	0.1	0.1	0.3	0.8
NF1	352	0.2	0.3	0	0.1	0.1	0.2	1.9		NF1	352	0.3	0.5	0	0	0.1	0.3	2.8
NOTCH1	308	0.4	0.3	0	0.1	0.2	0.6	1.6		NOTCH1	308	0.4	0.4	0	0.1	0.2	0.5	2
NOTCH4	220	0.3	0.2	0	0.2	0.3	0.4	1.1		NOTCH4	220	0.4	0.3	0	0.1	0.3	0.5	1.2
PALB2	264	0.2	0.2	0	0.1	0.1	0.3	0.7		PALB2	264	0.2	0.3	0	0	0.1	0.2	1.6
PIK3CA	528	0.3	0.3	0	0	0.2	0.4	1.7		PIK3CA	528	0.4	0.4	0	0	0.2	0.5	2
PIK3R1	176	0.3	0.3	0	0.1	0.3	0.5	1.2		PIK3R1	176	0.4	0.4	0	0	0.3	0.6	2
PTEN	484	0.3	0.3	0	0.1	0.3	0.5	1.7		PTEN	484	0.4	0.3	0	0	0.3	0.6	1.9
RAD51C	220	0.3	0.2	0	0.1	0.2	0.4	1		RAD51C	220	0.3	0.4	0	0	0.2	0.3	2.8
RARA	88	0.2	0.1	0	0.1	0.2	0.2	0.4		RARA	88	0.1	0	0	0.1	0.1	0.1	0.2
RB1	176	0.1	0.1	0	0	0	0.2	0.5		RB1	176	0.1	0.1	0	0	0	0.1	0.4
TBX3	264	0.5	0.2	0	0.3	0.5	0.6	1.2		TBX3	264	0.4	0.2	0	0.3	0.4	0.6	1.9
TERT	264	0.3	0.3	0	0	0.1	0.4	1.4		TERT	264	0.2	0.3	0	0	0.1	0.4	1.6
TOP2A	264	0.3	0.2	0	0.1	0.2	0.4	0.9		TOP2A	264	0.3	0.3	0	0.1	0.2	0.4	1.5
TP53	616	0.4	0.3	0	0.2	0.3	0.6	1.5		TP53	616	0.3	0.2	0	0.1	0.2	0.4	1.4
VEGFA	308	0.4	0.3	0	0.1	0.4	0.6	1.4		VEGFA	308	0.4	0.4	0	0.1	0.3	0.7	1.9
ZNF217	264	0.4	0.2	0	0.2	0.4	0.5	1.3		ZNF217	264	0.5	0.5	0	0.1	0.4	0.7	2.9
ZNF703	132	0.4	0.2	0	0.2	0.4	0.5	1		ZNF703	132	0.1	0.1	0	0	0	0.1	0.5
										Note: colored cells reflect outliers for max gene read ratios
										Note 2: N = number of amplicons per gene X number of samples (all observations for the same gene in the same sample series)
